# Supplementary material for: Anti-stigma interventions in low-income and middle-income countries: a systematic review
Source: PubMed Central journal article supplement — eClinicalMedicine. 2024 Apr 26;72:102612. doi: 10.1016/j.eclinm.2024.102612 (PMC11066569; doi:10.1016/j.eclinm.2024.102612), 2024-04-26
Supplement: mmc1.pdf [file mmc1.pdf]

### Supplementary Table 1: Population, Context, Phenomena of Interest, Study Design and Time Frame

|                              |                                                                                                             |
|------------------------------|-------------------------------------------------------------------------------------------------------------|
| <b>Population</b>            | Low and Middle-Income Countries                                                                             |
| <b>Focus of intervention</b> | Anti-stigma interventions                                                                                   |
| <b>Context</b>               | Stigma related to all issues, identities, and conditions                                                    |
| <b>Study design</b>          | Randomised controlled Trials<br>Quasi-experimental designs<br>Non-Experimental with pre-post/ control group |
| <b>Time frame</b>            | Up to January 30, 2024                                                                                      |

### Supplementary Table 2: Summary of search strategy for electronic database searches

|                                                                                                                                                                                                                                                                                                                                                                                                                                                                                                                                                                                                                                                                                                                                                                                                                                                                                                                                                                                                                                                                                                                                                                                                                                                                                                                                                                                                                                                                                                                                                                                                                                                                                                                                                                                                                                                                                                                                                                                                                                                                   |
|-------------------------------------------------------------------------------------------------------------------------------------------------------------------------------------------------------------------------------------------------------------------------------------------------------------------------------------------------------------------------------------------------------------------------------------------------------------------------------------------------------------------------------------------------------------------------------------------------------------------------------------------------------------------------------------------------------------------------------------------------------------------------------------------------------------------------------------------------------------------------------------------------------------------------------------------------------------------------------------------------------------------------------------------------------------------------------------------------------------------------------------------------------------------------------------------------------------------------------------------------------------------------------------------------------------------------------------------------------------------------------------------------------------------------------------------------------------------------------------------------------------------------------------------------------------------------------------------------------------------------------------------------------------------------------------------------------------------------------------------------------------------------------------------------------------------------------------------------------------------------------------------------------------------------------------------------------------------------------------------------------------------------------------------------------------------|
| <p><b>In-text search:</b></p> <p><i>[Focus of intervention]</i><br/>         stigma or stigma* or stereotyp* or Social Perception/ or Social Distance/ or "Rejection (Psychology)"/ or Human Rights/ or Civil Rights/ or Social Justice/ or public opinion or social distance or empower* or "Discrimination (Psychology)"/ or discrimination or marginali* or injustice or intergroup or inter-group</p> <p>AND</p> <p><i>[Context]</i><br/>         Disab* or Mental Health/ or Mental Disorders/ or Mentally Ill Persons/ or antirac* anti-rac* or ethnic* or diversity or minorit* or multicultur* or indigenous or segregat* or desegregat* or conflict or war or interracial or inter-racial or religi* or anti-Semiti* or HIV or Human Immunodeficiency Virus or AIDS or Tuberculosis or Sexualit* or Homosex* or MSM or Bisexual or transgender or Sexism or Elder* or Ageism or Obes* or Overweight or Alcohol* or Drug Abuse or Addict</p> <p>AND</p> <p><i>[Study design]</i><br/>         randomized controlled trial or controlled clinical trial or evaluation studies or Prospective Studies/ or Follow-Up Studies/ or intervention* or Intervention Studies/or Randomized Controlled Trials as Topic/ or randomi* or pre-post or time series or time point</p> <p>AND</p> <p><i>[Content]</i><br/>         Social Marketing/ or National Health Programs/ or Government Programs/ or Program Development/ or Mass Media/ or Learning/ or Multimedia/ or Teaching/ or Internet/ or Journalism/ or Virtual Software/ or Pamphlets/ or Advertising as Topic/ or Public Relations/ or Persuasive Communication/ or Celebrity* or Famous Persons/ or Health Knowledge, Attitudes, Practice/ or Awareness or Consumer Advocacy/ or Patient Advocacy/ or Health Promotion/ or Campaign or advert* or marketing or public relation* or newspaper* or newsletter* or broadcast or radio or television or cinema or DVD or website or compact or disc or movie or film or trailer or stigma resilience or stigma change or testimon* or health literacy</p> |
|-------------------------------------------------------------------------------------------------------------------------------------------------------------------------------------------------------------------------------------------------------------------------------------------------------------------------------------------------------------------------------------------------------------------------------------------------------------------------------------------------------------------------------------------------------------------------------------------------------------------------------------------------------------------------------------------------------------------------------------------------------------------------------------------------------------------------------------------------------------------------------------------------------------------------------------------------------------------------------------------------------------------------------------------------------------------------------------------------------------------------------------------------------------------------------------------------------------------------------------------------------------------------------------------------------------------------------------------------------------------------------------------------------------------------------------------------------------------------------------------------------------------------------------------------------------------------------------------------------------------------------------------------------------------------------------------------------------------------------------------------------------------------------------------------------------------------------------------------------------------------------------------------------------------------------------------------------------------------------------------------------------------------------------------------------------------|

### Supplementary Table 3: Inclusion and Exclusion Criteria

| <b>Inclusion Criteria</b>                                                                                                                       | <b>Exclusion Criteria</b>                   |
|-------------------------------------------------------------------------------------------------------------------------------------------------|---------------------------------------------|
| Intervention intending to improve stigma, discrimination, knowledge, attitudes or behaviour (among a defined ingroup) toward a defined outgroup | Absence of intervention                     |
| Stigma as the primary or secondary outcome                                                                                                      | Absence of stigma-related outcome measure   |
| Presence of a comparator/ baseline assessment                                                                                                   | Absence of comparator                       |
| Pre/ Post or Post study designs                                                                                                                 | Review papers                               |
| Empirical studies                                                                                                                               | Abstracts/ conference papers/ Dissertations |
| Quantitative studies                                                                                                                            | Qualitative studies                         |
| Low and Middle-income countries                                                                                                                 | High-income countries                       |
| Studies in all languages if a translated version could be accessed or a collaborator with appropriate language skills could be found.           |                                             |

**Supplementary Table 4: Summary and characteristics of included studies**

|                                          | Country                | Income Group                               | Stigma Context            | Target Population                                                                             | Nature of the intervention                                                                      | Direction of Effect   | Quality Assessment (out of 6) |
|------------------------------------------|------------------------|--------------------------------------------|---------------------------|-----------------------------------------------------------------------------------------------|-------------------------------------------------------------------------------------------------|-----------------------|-------------------------------|
| <b>Randomised Controlled Trials</b>      |                        |                                            |                           |                                                                                               |                                                                                                 |                       |                               |
| Adam (2004) <sup>1</sup>                 | Kenya                  | Low income                                 | HIV/ AIDS                 | Young Adults                                                                                  | Educational                                                                                     | No significant effect | 1                             |
| Bayar et al. (2009) <sup>2</sup>         | Turkey                 | Upper-Middle Income                        | Mental Health             | Health Professionals                                                                          | Educational                                                                                     | Positive              | 3                             |
| Bhana et al. (2014) <sup>3</sup>         | South Africa           | Lower-Middle Income                        | HIV/ AIDS                 | People Living with Condition (HIV/AIDS) Caregivers of People with Condition (HIV/AIDS)        | Educational, Contact based                                                                      | Positive              | 5                             |
| Bond et al. (2017) <sup>4</sup>          | Zambia<br>South Africa | Lower-Middle Income<br>Upper-Middle Income | Tuberculosis and HIV/AIDS | Recently diagnosed TB patients; Adult members of their households                             | Educational, Contact based                                                                      | No significant effect | 6                             |
| Bruneau et al. (2012) <sup>5</sup>       | West Bank & Gaza       | Lower-Middle Income                        | Ethnicity/ Race/ Religion | Ethnic Group                                                                                  | Social activism                                                                                 | Positive              | 4                             |
| Clair et al. (2022) <sup>6</sup>         | Kenya                  | Lower-Middle Income                        | Alcohol and Drug Use      | Health workers in community clinics and the hospital outpatient departments                   | Educational, Contact based                                                                      | Positive              | 5                             |
| De Vargas (2013) <sup>7</sup>            | Brazil                 | Lower-Middle Income                        | Alcohol and Drug Use      | Health professionals                                                                          | Counselling/ mentoring/ Case management, Contact based                                          | Positive              | 5                             |
| Denison et al. (2020) <sup>8</sup>       | Zambia                 | Low income                                 | HIV/ AIDS                 | HIV-positive adolescents and young adults (AYA) between the ages of 15-24 years               | Counselling/ mentoring/ Case management, Contact based, Increased access/ outreach for services | Positive              | 4                             |
| Ergene T et al. (2005) <sup>9</sup>      | Turkey                 | Upper-Middle Income                        | HIV/ AIDS                 | Young Adults                                                                                  | Educational                                                                                     | Positive              | 4                             |
| Fernandez et al. (2016) <sup>10</sup>    | Malaysia               | Upper-Middle Income                        | Mental Health             | Health professionals                                                                          | Educational, Contact based                                                                      | Positive              | 4                             |
| Ghaemi et al. (2013) <sup>11</sup>       | Iran                   | Upper-Middle Income                        | HIV/ AIDS                 | Young Adults                                                                                  | Educational                                                                                     | Positive              | 4                             |
| Han et al. (2023) <sup>12</sup>          | China                  | Upper-Middle Income                        | Mental Health             | Young Adults                                                                                  | Educational, Contact based                                                                      | Positive              | 6                             |
| Islam et al. (2021) <sup>13</sup>        | India                  | Lower-Middle Income                        | Ethnicity/ Race/ Religion | Individuals who previously participated in a correspondence study on caste discrimination     | Educational                                                                                     | Positive              | 2                             |
| Kaljee et al. (2017) <sup>14</sup>       | Zambia                 | Low income                                 | Mental Health             | Teachers and students                                                                         | Educational                                                                                     | Positive              | 3                             |
| Kutcher et al. (2019) <sup>15</sup>      | Malawi & Tanzania      | Low Income and Lower-Middle Income         | Mental Health             | Health care providers                                                                         | Educational                                                                                     | Positive              | 2                             |
| Larsen et al. (2004) <sup>16</sup>       | Sierra Leone           | Low income                                 | HIV/AIDS                  | High Risk Group (Sex Workers, Military Personnel)                                             | Not described                                                                                   | No significant effect | 3                             |
| Li et al. (2015) <sup>17</sup>           | China                  | Upper-Middle Income                        | Mental Health             | Health Professionals                                                                          | Educational                                                                                     | No significant effect | 6                             |
| Lin et al. (2023) <sup>18</sup>          | China                  | Upper-Middle Income                        | Mental Health             | People Living with the Condition (Major Depressive Disorder)                                  | Educational, Contact based                                                                      | No significant effect | 4                             |
| Logie et al. (2023) <sup>19</sup>        | Uganda                 | Low Income                                 | HIV/AIDS                  | Refugees                                                                                      | Educational                                                                                     | Positive              | 6                             |
| Masquillier et al. (2015) <sup>20</sup>  | South Africa           | Upper-Middle Income                        | HIV/AIDS                  | People Living with the Condition (HIV Patients)                                               | Counselling/ mentoring/ Case management, Increased access/ outreach for services                | Positive              | 5                             |
| Mockiene et al. (2011) <sup>21</sup>     | Lithuania              | Upper-Middle Income                        | HIV/AIDS                  | Health Professionals                                                                          | Educational, Contact based                                                                      | No significant effect | 4                             |
| Ngoc et al. (2016) <sup>22</sup>         | Vietnam                | Lower-Middle Income                        | Mental Health             | People Living with the Condition (Schizophrenia) & Caregivers of People Living with Condition | Educational                                                                                     | Positive              | 4                             |
| Oduguwa A. O et al. (2017) <sup>23</sup> | Nigeria                | Lower-Middle Income                        | Mental Health             | Children and Adolescents                                                                      | Educational                                                                                     | Positive              | 4                             |
| Rice et al. (2012) <sup>24</sup>         | China                  | Upper-Middle Income                        | HIV/AIDS                  | High Risk Groups (Market vendors)                                                             | Educational                                                                                     | Positive              | 0                             |
| Russel et al. (1999) <sup>25</sup>       | India                  | Low Income                                 | Disability                | Caregivers of People Living with the Condition (Intellectual Disability)                      | Educational                                                                                     | Positive              | 4                             |
| Sanatana et al. (1992) <sup>26</sup>     | Philippines            | Lower-Middle Income                        | HIV/AIDS                  | Health Professionals                                                                          | Educational                                                                                     | Positive              | 3                             |
| Techapoonpon et al. (2023) <sup>27</sup> | Nepal                  | Lower-Middle Income                        | COVID-19                  | People with Lived Experience of COVID-19 (survivors)                                          | Educational                                                                                     | Mixed effect          | 4                             |

|                                              | Country      | Income Group        | Stigma Context                   | Target Population                                                                                                                                 | Nature of the intervention                                          | Direction of Effect   | Quality Assessment (out of 6) |
|----------------------------------------------|--------------|---------------------|----------------------------------|---------------------------------------------------------------------------------------------------------------------------------------------------|---------------------------------------------------------------------|-----------------------|-------------------------------|
| Tergesen, C. L., et al. (2021) <sup>28</sup> | Nepal        | Lower-Middle Income | Mental Health                    | Second and third year pre-clinical medical students                                                                                               | Educational, Contact based                                          | Mixed effect          | 6                             |
| Vasiljevic et al. (2013) <sup>29</sup>       | Macedonia    | Upper-Middle Income | Ethnicity/ Race/ Religion        | Ethic Group                                                                                                                                       | Social activism                                                     | Positive              | 4                             |
| Vazquez et al. (2023) <sup>30</sup>          | Cameroon     | Lower-Middle Income | HIV/AIDS                         | High Risk Groups (female sex workers)                                                                                                             | Educational, Contact based, Increased access/ outreach for services | Positive              | 6                             |
| Vogt et al. (2016) <sup>31</sup>             | Sudan        | Lower-Middle Income | Gender/Sexuality/ Women's Health | General Population                                                                                                                                | Social activism                                                     | Positive              | 4                             |
| West et al. (2015) <sup>32</sup>             | Jamaica      | Upper-Middle Income | Gender/Sexuality/ Women's Health | Young Adults                                                                                                                                      | Social activism                                                     | No significant effect | 4                             |
| Wingood et al. (2013) <sup>33</sup>          | South Africa | Upper-Middle Income | HIV/AIDS                         | Women                                                                                                                                             | Educational                                                         | Positive              | 3                             |
| Wu et al. (2008) <sup>34</sup>               | China        | Upper-Middle Income | HIV/AIDS                         | Health Professionals                                                                                                                              | Educational                                                         | Positive              | 3                             |
| Yang et al. (2022) <sup>35</sup>             | Botswana     | Lower-Middle Income | HIV/AIDS                         | Pregnant women living with HIV aged 18-45 years in Botswana                                                                                       | Educational, Contact based, Increased access/ outreach for services | Positive              | 5                             |
| <b>Cluster Randomised Controlled Trials</b>  |              |                     |                                  |                                                                                                                                                   |                                                                     |                       |                               |
| Aplasca et al. (1995) <sup>36</sup>          | Philippines  | Lower-Middle Income | HIV/AIDS                         | Children and Adolescents                                                                                                                          | Educational                                                         | Positive              | 4                             |
| Arthur et al. (2020) <sup>37</sup>           | Ghana        | Lower-Middle Income | Mental Health                    | Current district assembly members (similar to local councillors)                                                                                  | Educational                                                         | No significant effect | 6                             |
| Arthur et al. (2021) <sup>38</sup>           | Ghana        | Lower-Middle Income | Mental Health                    | Ghanaian community leaders                                                                                                                        | Educational, Contact based                                          | Positive              | 6                             |
| Caceres et al. (1994) <sup>39</sup>          | Peru         | Lower-Middle Income | HIV/AIDS                         | Children and Adolescents                                                                                                                          | Educational                                                         | Positive              | 4                             |
| Chongruksa et al. (2011) <sup>40</sup>       | Thailand     | Lower-Middle Income | Ethnicity/ Race/ Religion        | Ethnic Group                                                                                                                                      | Educational, Contact based                                          | Positive              | 4                             |
| Dey et al. (2020) <sup>41</sup>              | India        | Lower-Middle Income | Mental Health                    | Residents of Kolkata (From one of the three clusters: urban, homeless, comparison site) between the ages of 18-60 years, no known mental illness. | Educational, Contact based, Increased access/ outreach for services | Positive              | 6                             |
| Dijkstra et al. (2023) <sup>42</sup>         | Ethiopia     | Low Income          | Mental Health                    | People with diagnosed Schizophrenia Spectrum Disorder and primary caregivers of People living with the condition                                  | Educational, Contact based                                          | No significant effect | 6                             |
| Doherty T et al. (2013) <sup>43</sup>        | South Africa | Upper-Middle Income | HIV/AIDS                         | General Population                                                                                                                                | Educational, Increased access/ outreach for services                | No significant effect | 5                             |
| Green et al. (2021) <sup>44</sup>            | Tanzania     | Lower-Middle Income | HIV/AIDS                         | Villagers from 30 rural villages distributed evenly across 15 wards in Tanzania's northeastern Tanga Region.                                      | Educational, Contact based                                          | Positive              | 2                             |
| Harvey et al. (2000) <sup>45</sup>           | South Africa | Upper-Middle Income | HIV/AIDS                         | Children and Adolescents                                                                                                                          | Social activism, Contact based                                      | Positive              | 5                             |
| Jürgensen et al. (2013) <sup>46</sup>        | Zambia       | Lower-Middle Income | HIV/AIDS                         | General Population                                                                                                                                | Educational, Increased access/ outreach for services                | Positive              | 6                             |
| Kohrt et al. (2021) <sup>47</sup>            | Nepal        | Lower-Middle Income | Mental Health                    | Primary care practitioners and People With Lived Experience of mental illness                                                                     | Educational                                                         | Positive              | 5                             |
| Li et al. (2018) <sup>48</sup>               | Vietnam      | Lower-Middle Income | Alcohol and Drug Use             | Health professionals                                                                                                                              | Educational                                                         | Positive              | 5                             |
| Li et al. (2013) <sup>49</sup>               | China        | Upper-Middle Income | HIV/AIDS                         | Health professionals                                                                                                                              | Educational                                                         | Positive              | 6                             |
| Li et al. (2013) <sup>50</sup>               | China        | Upper-Middle Income | HIV/AIDS                         | Health professionals                                                                                                                              | Educational                                                         | Positive              | 6                             |
| Li et al. (2015) <sup>51</sup>               | China        | Upper-Middle Income | HIV/AIDS                         | Health professionals                                                                                                                              | Educational                                                         | Positive              | 6                             |
| Li et al. (2013) <sup>52</sup>               | China        | Upper-Middle Income | Alcohol and Drug Use             | Health Professionals, People Living with Condition (Drug User)                                                                                    | Educational, Contact based, Increased access/ outreach for services | No significant effect | 4                             |
| Li et al. (2014) <sup>53</sup>               | China        | Upper-Middle Income | HIV/AIDS                         | Health professionals                                                                                                                              | Educational                                                         | Positive              | 4                             |
| Li et al. (2014) <sup>54</sup>               | China        | Upper-Middle Income | HIV/AIDS                         | Health professionals                                                                                                                              | Educational                                                         | Positive              | 4                             |
| Liu J. (2015) <sup>55</sup>                  | China        | Upper-Middle Income | HIV/AIDS                         | High Risk Groups (Sex Workers)                                                                                                                    | Educational                                                         | Positive              | 6                             |

|                                                    | Country                     | Income Group                     | Stigma Context                   | Target Population                                                                                                                        | Nature of the intervention                                                       | Direction of Effect   | Quality Assessment (out of 6) |
|----------------------------------------------------|-----------------------------|----------------------------------|----------------------------------|------------------------------------------------------------------------------------------------------------------------------------------|----------------------------------------------------------------------------------|-----------------------|-------------------------------|
| Low et al. (2013) <sup>56</sup>                    | Kenya                       | Low income                       | HIV/AIDS                         | General Population                                                                                                                       | Counselling/ mentoring/ Case management, Increased access/ outreach for services | No significant effect | 3                             |
| Paluck et al. (2009) <sup>57</sup>                 | Rwanda                      | Low income                       | Ethnicity/ Race/ Religion        | General Population, Survivors of Genocide & Perpetrators of Genocide                                                                     | Educational                                                                      | No significant effect | 1                             |
| Paluck et al. (2009) <sup>58</sup>                 | Rwanda                      | Low income                       | Ethnicity/ Race/ Religion        | General Population, Survivors of genocide & Perpetrators of Genocide                                                                     | Educational                                                                      | Positive              | 1                             |
| Peltzer et al. (2011) <sup>59</sup>                | South Africa                | Upper-Middle Income              | HIV/AIDS                         | Young Adults                                                                                                                             | Educational                                                                      | Positive              | 4                             |
| Peltzer et al. (2012) <sup>60</sup>                | South Africa                | Upper-Middle Income              | HIV/AIDS                         | Young Adults                                                                                                                             | Educational                                                                      | Positive              | 4                             |
| Pereira et al. (2015) <sup>61</sup>                | Brazil                      | Upper-Middle Income              | Mental Health                    | Teachers                                                                                                                                 | Educational                                                                      | Positive              | 5                             |
| Peters et al. (2015) <sup>62</sup>                 | Indonesia                   | Lower-Middle Income              | Leprosy                          | General Population                                                                                                                       | Educational, Contact based                                                       | Positive              | 5                             |
| Ran et al. (2003) <sup>63</sup>                    | China                       | Upper-Middle Income              | Mental Health                    | Caregivers of People Living with Condition (Mental Health)                                                                               | Educational, Increased access/ outreach for services                             | Positive              | 3                             |
| Sanja Totic et al. (2012) <sup>64</sup>            | Serbia                      | Upper-Middle Income              | Mental Health                    | Health Professionals                                                                                                                     | Educational                                                                      | Negative              | 2                             |
| Wilke, A. M., et al. (2020) <sup>65</sup>          | Uganda                      | Lower-Middle Income              | Ethnicity/ Race/ Religion        | Village community (56 villages)                                                                                                          | Social activism, Contact based, Increased access/ outreach for services          | Positive              | 6                             |
| Young et al. (2011) <sup>66</sup>                  | Peru                        | Upper-Middle Income              | HIV/AIDS                         | High Risk Groups (unemployed men, gay men, socially marginalised women)                                                                  | Educational                                                                      | Positive              | 5                             |
| <b>Quasi-Experimental</b>                          |                             |                                  |                                  |                                                                                                                                          |                                                                                  |                       |                               |
| Adelekan et al. (2001) <sup>67</sup>               | Nigeria                     | Low income                       | Mental Health                    | Health Professionals                                                                                                                     | Educational                                                                      | Positive              | 3                             |
| Ajuwon et al. (2014) <sup>68</sup>                 | Nigeria                     | Lower-Middle Income              | HIV/AIDS                         | General Population                                                                                                                       | Educational, Contact based                                                       | Positive              | 2                             |
| Akuiyibo et al. (2021) <sup>69</sup>               | Nigeria                     | Lower-Middle Income              | Gender/Sexuality/ Women's Health | Young people aged 15–24 years, who participated in the MTV Shuga Peer Education intervention, from communities in Kaduna and Kano States | Educational, Contact based                                                       | Positive              | 4                             |
| Al Ramiah and Hewstone M. (2012) <sup>70</sup>     | Malaysia                    | Upper-Middle Income              | Ethnicity/ Race/ Religion        | Children and Adolescents                                                                                                                 | Educational, Contact based                                                       | Positive              | 3                             |
| Al-Iryani et al. (2011) <sup>71</sup>              | Yemen                       | Lower-Middle Income              | HIV/AIDS                         | Children and Adolescents                                                                                                                 | Educational                                                                      | Positive              | 3                             |
| Apinundecha et al. (2007) <sup>72</sup>            | Thailand                    | Lower-Middle Income              | HIV/AIDS                         | General Population                                                                                                                       | Educational, Contact based                                                       | Positive              | 3                             |
| Armstrong et al. (2011) <sup>73</sup>              | India                       | Lower-Middle Income              | Mental Health                    | Health Professionals                                                                                                                     | Educational                                                                      | Positive              | 4                             |
| Artawan Eka Putra et al. (2023) <sup>74</sup>      | Indonesia                   | Upper-Middle Income              | Tuberculosis                     | Household contacts of people with Tuberculosis                                                                                           | Educational, Contact based, Increased access/ outreach for services              | Positive              | 5                             |
| Bahrami R and Khalifi T et al.(2022) <sup>75</sup> | Iran                        | Lower-Middle Income              | Mental Health                    | 18 to 65 years of age, spending the most caregiving time for the person with bipolar disorder, and lack of physical disability.          | Educational, Contact based                                                       | Positive              | 5                             |
| Balfour et al. (2013) <sup>76</sup>                | South Africa                | Upper-Middle Income              | HIV/AIDS                         | Men and women aged 20 -79 years, who are community members in Eswatini, Uganda and Zimbabwe.                                             | Educational                                                                      | Positive              | 4                             |
| Balogun et al. (2015) <sup>77</sup>                | Nigeria                     | Lower-Middle Income              | Tuberculosis                     | General Population                                                                                                                       | Educational, Increased access/ outreach for services                             | Negative              | 5                             |
| Bandopadhyay et al.(2021) <sup>78</sup>            | Zimbabwe, Uganda & Eswatini | Lower-Middle Income & Low Income | HIV/AIDS                         | Men and women aged 20-79 years, who are community members in Eswatini, Uganda and Zimbabwe.                                              | Educational, Contact based                                                       | Positive              | 5                             |
| Baptiste et al. (2006) <sup>79</sup>               | South Africa                | Upper-Middle Income              | HIV/AIDS                         | Children and Adolescents & Parents                                                                                                       | Educational                                                                      | Positive              | 2                             |
| Bekele et al. (2016) <sup>80</sup>                 | Ethiopia                    | Low income                       | HIV/AIDS                         | Children and Adolescents                                                                                                                 | Educational                                                                      | Positive              | 4                             |
| Bella-Awusah et al. (2014) <sup>81</sup>           | Nigeria                     | Lower-Middle Income              | Mental Health                    | Children and Adolescents                                                                                                                 | Educational                                                                      | No significant effect | 3                             |
| Bichoualme et al. (2023) <sup>82</sup>             | Morocco                     | Lower-Middle Income              | Mental Health                    | High School in-service teachers                                                                                                          | Educational, Contact based                                                       | Positive              | 4                             |
| Bilali et al. (2016) <sup>83</sup>                 | Burundi                     | Low income                       | Ethnicity/ Race/ Religion        | General Population                                                                                                                       | Not described                                                                    | Positive              | 5                             |
| Bitta et al. (2023) <sup>84</sup>                  | Kenya                       | Lower-Middle Income              | Mental Health                    | General Population                                                                                                                       | Educational, Contact based                                                       | Positive              | 5                             |

|                                               | Country                               | Income Group                                                               | Stigma Context                      | Target Population                                                                                                                    | Nature of the intervention                                          | Direction of Effect   | Quality Assessment (out of 6) |
|-----------------------------------------------|---------------------------------------|----------------------------------------------------------------------------|-------------------------------------|--------------------------------------------------------------------------------------------------------------------------------------|---------------------------------------------------------------------|-----------------------|-------------------------------|
| Boon et al. (2009) <sup>85</sup>              | South Africa                          | Upper-Middle Income                                                        | HIV/AIDS                            | Caregivers of People with Condition (Orphans from HIV/AIDS)                                                                          | Educational                                                         | Positive              | 3                             |
| Brick et al. (2021) <sup>86</sup>             | Liberia                               | Lower-Middle Income                                                        | Mental Health                       | Secondary science teachers                                                                                                           | Educational                                                         | Mixed effect          | 5                             |
| Bu et al. (2023) <sup>87</sup>                | China                                 | Lower-Middle Income                                                        | Mental Health                       | Elite athletes teams' staff and officials                                                                                            | Educational, Contact based                                          | Positive              | 6                             |
| Cheng et al. (2008) <sup>88</sup>             | China                                 | Lower-Middle Income                                                        | HIV/AIDS                            | Children and Adolescents                                                                                                             | Educational                                                         | Positive              | 4                             |
| Chenneville et al. (2019) <sup>89</sup>       | Kenya                                 | Lower-Middle Income                                                        | HIV/AIDS                            | Youth between the ages of 13-24 years                                                                                                | Educational, Contact based                                          | Positive              | 5                             |
| Cherian et al. (2009) <sup>90</sup>           | South Africa                          | Upper-Middle Income                                                        | HIV/AIDS                            | Criminal Justice Professionals                                                                                                       | Not described                                                       | No significant effect | 3                             |
| Chi et al. (2015) <sup>91</sup>               | China                                 | Upper-Middle Income                                                        | Gender/Sexuality/<br>Women's Health | Young Adults                                                                                                                         | Educational                                                         | Positive              | 4                             |
| Chidrawi et al. (2014) <sup>92</sup>          | South Africa                          | Upper-Middle Income                                                        | HIV/AIDS                            | People Living with Condition (HIV)                                                                                                   | Educational                                                         | Positive              | 4                             |
| Chimwaza et al. (2012) <sup>93</sup>          | Malawi                                | Low income                                                                 | HIV/AIDS                            | People Living with Condition (HIV)                                                                                                   | Educational, Increased access/ outreach for services                | No significant effect | 3                             |
| Colchero et al. (2016) <sup>94</sup>          | Mexico                                | Upper-Middle Income                                                        | HIV/AIDS                            | Health professionals                                                                                                                 | Educational, Increased access/ outreach for services                | Positive              | 5                             |
| Cole et al. (2003) <sup>95</sup>              | West Bank & Gaza                      | Lower-Middle Income                                                        | Ethnicity/ Race/<br>Religion        | Ethnic Group                                                                                                                         | Social activism                                                     | Positive              | 3                             |
| Costa et al. (2016) <sup>96</sup>             | Brazil                                | Upper-Middle Income                                                        | Gender/Sexuality/<br>Women's Health | Health professionals                                                                                                                 | Educational                                                         | Positive              | 4                             |
| Creel et al. (2011) <sup>97</sup>             | Malawi                                | Lower-Middle Income                                                        | HIV/AIDS                            | General Population                                                                                                                   | Social activism, Contact based                                      | Positive              | 6                             |
| Da Silva C. et al. (2011) <sup>98</sup>       | Brazil                                | Upper-Middle Income                                                        | Mental Health                       | Health professionals                                                                                                                 | Educational                                                         | Positive              | 5                             |
| Denison et al. (2012) <sup>99</sup>           | Zambia                                | Lower-Middle Income                                                        | HIV/AIDS                            | Children and Adolescents                                                                                                             | Educational                                                         | Positive              | 3                             |
| De Lemus et al. (2014) <sup>100</sup>         | Argentina & El Salvador               | Upper-Middle Income ;<br>Lower-Middle Income                               | Gender/Sexuality/<br>Women's Health | Other (Researchers)                                                                                                                  | Educational                                                         | Positive              | 6                             |
| Devarayasamudram et al. (2018) <sup>101</sup> | India                                 | Lower-Middle Income                                                        | HIV/AIDS                            | Young women aged between 20-40 years, living in the selected eight blocks (villages)/mandals (subdistricts)                          | Educational, Contact based                                          | Positive              | 3                             |
| Edwards N et al. (2016) <sup>102</sup>        | Jamaica, Kenya, South Africa & Uganda | Upper-Middle Income, Lower-Middle Income, Upper-Middle Income & Low Income | HIV/AIDS                            | Health professionals                                                                                                                 | Counselling/ mentoring/<br>Casemanagement                           | Positive              | 5                             |
| Esen-Danaci et al. (2016) <sup>103</sup>      | Turkey                                | Lower-Middle Income                                                        | Mental Health                       | Health professionals                                                                                                                 | Educational, Increased access/ outreach for services                | Positive              | 2                             |
| Ezedinachi ENU et al. (2002) <sup>104</sup>   | Nigeria                               | Lower-Middle Income                                                        | HIV/AIDS                            | Health professionals                                                                                                                 | Educational                                                         | Positive              | 4                             |
| Fawole et al. (1999) <sup>105</sup>           | Nigeria                               | Lower-Middle Income                                                        | HIV/AIDS                            | Children and Adolescents                                                                                                             | Educational                                                         | Positive              | 2                             |
| Fawzi et al. (2010) <sup>106</sup>            | Haiti                                 | Lower-Middle Income                                                        | HIV/AIDS                            | People Living with Condition (Children with HIV) & Caregivers of People Living with Conditions                                       | Educational                                                         | Positive              | 4                             |
| Fawzi et al. (2012) <sup>107</sup>            | Haiti                                 | Lower-Middle Income                                                        | HIV/AIDS                            | People Living with Condition (HIV Affected Families)                                                                                 | Counselling/ mentoring/<br>Casemanagement,                          | Positive              | 5                             |
| Figueroa et al. (2016) <sup>108</sup>         | Mozambique                            | Low income                                                                 | HIV/AIDS                            | General Population                                                                                                                   | Educational, Contact based                                          | Positive              | 3                             |
| Gao et al. (2012) <sup>109</sup>              | China                                 | Upper-Middle Income                                                        | HIV/AIDS                            | Children and Adolescents                                                                                                             | Educational                                                         | Positive              | 3                             |
| Geetha et al. (2012) <sup>110</sup>           | India                                 | Lower-Middle Income                                                        | Disability                          | Teachers                                                                                                                             | Educational                                                         | Positive              | 2                             |
| Geibel et al. (2017) <sup>111</sup>           | Bangladesh                            | Low income                                                                 | HIV/AIDS                            | Health professionals                                                                                                                 | Educational                                                         | Positive              | 3                             |
| Giuliano et al. (2019) <sup>112</sup>         | Bolivia                               | Lower-Middle Income                                                        | Disability                          | Ethnic groups                                                                                                                        | Educational, Contact based                                          | No significant effect | 5                             |
| Gonzalez-Bernal et al. (2021) <sup>113</sup>  | Morocco                               | Lower-Middle Income                                                        | Disability                          | Beneficiary or in contact with the "Happiness Without Borders (HWB) Association", residing in Azrou or in the continuous localities. | Educational, Contact based                                          | Positive              | 5                             |
| Goswami et al. (2024) <sup>114</sup>          | India                                 | Lower-Middle Income                                                        | Mental Health                       | College students in a residential university                                                                                         | Educational, Contact based, Increased access/ outreach for services | Positive              | 6                             |
| Gupta et al. (2012) <sup>115</sup>            | India                                 | Lower-Middle Income                                                        | HIV/AIDS                            | Children and Adolescents                                                                                                             | Educational                                                         | Positive              | 2                             |
| He et al. (2016) <sup>116</sup>               | China                                 | Upper-Middle Income                                                        | HIV/AIDS                            | Health professionals                                                                                                                 | Educational, Increased access/ outreach for services                | Positive              | 4                             |

|                                         | Country                                         | Income Group                                                                                             | Stigma Context                   | Target Population                                                                                                                                        | Nature of the intervention                                                                      | Direction of Effect   | Quality Assessment (out of 6) |
|-----------------------------------------|-------------------------------------------------|----------------------------------------------------------------------------------------------------------|----------------------------------|----------------------------------------------------------------------------------------------------------------------------------------------------------|-------------------------------------------------------------------------------------------------|-----------------------|-------------------------------|
| Hearst et al. (2022) <sup>117</sup>     | Zambia                                          | Low income                                                                                               | Disability                       | Children with disabilities                                                                                                                               | Educational, Contact based, Increased access/ outreach for services                             | Positive              | 2                             |
| Iheanacho et al. (2014) <sup>118</sup>  | Nigeria                                         | Lower-Middle Income                                                                                      | Mental Health                    | Health professionals                                                                                                                                     | Educational                                                                                     | Positive              | 4                             |
| Iwu et al. (2021) <sup>119</sup>        | Nigeria                                         | Lower-Middle Income                                                                                      | Gender/Sexuality/ Women's Health | Traditional birth attendants practising within the three senatorial geopolitical zones of Imo State.                                                     | Educational, Contact based                                                                      | Positive              | 6                             |
| Jacobi et al. (2020) <sup>120</sup>     | Cameroon                                        | Lower-Middle Income                                                                                      | HIV/AIDS                         | Secondary school students, between the ages of 16-18 years.                                                                                              | Educational, Contact based                                                                      | Positive              | 2                             |
| Jafari et al. (2012) <sup>121</sup>     | Iran                                            | Upper-Middle Income                                                                                      | HIV/AIDS                         | Health professionals                                                                                                                                     | Educational                                                                                     | Positive              | 5                             |
| Jain et al. (2013) <sup>122</sup>       | Thailand                                        | Upper-Middle Income                                                                                      | HIV/AIDS                         | General Population                                                                                                                                       | Educational                                                                                     | Positive              | 4                             |
| Jewkes et al. (2014) <sup>123</sup>     | South Africa                                    | Upper-Middle Income                                                                                      | Gender/Sexuality/ Women's Health | High Risk Groups (Out of School Youths)                                                                                                                  | Educational                                                                                     | Positive              | 6                             |
| Junqueira et al. (2015) <sup>124</sup>  | Brazil                                          | Upper-Middle Income                                                                                      | Alcohol and Drug Use             | Health professionals                                                                                                                                     | Educational                                                                                     | Positive              | 6                             |
| Kaponda et al. (2009) <sup>125</sup>    | Malawi                                          | Low income                                                                                               | HIV/AIDS                         | Health professionals                                                                                                                                     | Educational, Contact based                                                                      | Positive              | 4                             |
| Kaponda et al. (2011) <sup>126</sup>    | Malawi                                          | Low income                                                                                               | HIV/AIDS                         | General Population                                                                                                                                       | Educational                                                                                     | No significant effect | 6                             |
| Kohrt et al. (2015) <sup>127</sup>      | Liberia                                         | Low income                                                                                               | Mental Health                    | Health Professionals & Criminal Justice Professionals                                                                                                    | Educational                                                                                     | Positive              | 5                             |
| Kraft et al. (2012) <sup>128</sup>      | Zambia                                          | Lower-Middle Income                                                                                      | HIV/AIDS                         | General Population                                                                                                                                       | Educational                                                                                     | No significant effect | 5                             |
| Kumari et al. (2023) <sup>129</sup>     | India                                           | Lower-Middle Income                                                                                      | Mental Health                    | People Living with Condition (Schizophrenia and Affective Disorder) and attending outpatient setting of one of the institutes of mental health           | Educational, Contact based                                                                      | Positive              | 5                             |
| Lalani and Bhutta (2019) <sup>130</sup> | Pakistan                                        | Lower-Middle Income                                                                                      | Ethnicity/ Race/ Religion        | School students                                                                                                                                          | Educational, Contact based                                                                      | Positive              | 3                             |
| Levav et al. (2005) <sup>131</sup>      | Argentina, Brazil, Chile, Colombia & Costa Rica | Upper-Middle Income, Lower-Middle Income, Upper-Middle Income, Lower-Middle Income & Upper-Middle Income | Mental Health                    | Health Professionals                                                                                                                                     | Educational                                                                                     | No significant effect | 4                             |
| Levy et al. (2021) <sup>132</sup>       | Kenya                                           | Lower-Middle Income                                                                                      | HIV/AIDS                         | Pregnant adolescent girls and adolescent mothers                                                                                                         | Counselling/ mentoring/ Case management, Contact based, Increased access/ outreach for services | Positive              | 4                             |
| Li et al. (2010) <sup>133</sup>         | China                                           | Upper-Middle Income                                                                                      | HIV/AIDS                         | High Risk Groups (Market Vendors)                                                                                                                        | Educational, Contact based                                                                      | Positive              | 5                             |
| Li et al. (2014) <sup>134</sup>         | China                                           | Upper-Middle Income                                                                                      | Mental Health                    | Health Professionals                                                                                                                                     | Educational, Contact based                                                                      | Positive              | 6                             |
| Li et al. (2011) <sup>135</sup>         | China                                           | Upper-Middle Income                                                                                      | HIV/AIDS                         | Children and Adolescents                                                                                                                                 | Educational                                                                                     | Positive              | 5                             |
| Lohiniva et al. (2016) <sup>136</sup>   | Egypt                                           | Lower-Middle Income                                                                                      | HIV/AIDS                         | Health Professionals                                                                                                                                     | Educational, Contact based                                                                      | Positive              | 4                             |
| Makenzius et al. (2023) <sup>137</sup>  | Kenya                                           | Lower-Middle Income                                                                                      | Gender/Sexuality/ Women's Health | Secondary school students                                                                                                                                | Educational, Contact based                                                                      | Positive              | 4                             |
| Manzoor et al. (2019) <sup>138</sup>    | Pakistan                                        | Lower-Middle Income                                                                                      | HIV/AIDS                         | Male and female doctors from different specialties, with community medicine or public health professionals, clinical medical professionals and dentists. | Educational, Contact based, Increased access/ outreach for services                             | Positive              | 2                             |
| Maulik et al. (2017) <sup>139</sup>     | India                                           | Lower-Middle Income                                                                                      | Mental Health                    | Lay village health workers (Accredited Social Health Activists -ASHAs) and primary care doctors                                                          | Educational, Contact based, Increased access/ outreach for services                             | Positive              | 4                             |
| Mbeba et al. (2011) <sup>140</sup>      | Malawi                                          | Low Income                                                                                               | HIV/AIDS                         | Health Professionals                                                                                                                                     | Educational                                                                                     | Positive              | 4                             |
| Mueller et al. (2011) <sup>141</sup>    | South Africa                                    | Upper-Middle Income                                                                                      | HIV/AIDS                         | Children and Adolescents                                                                                                                                 | Counselling/ mentoring/ Case management                                                         | Positive              | 5                             |
| Mutiso et al. (2017) <sup>142</sup>     | Kenya                                           | Lower-Middle Income                                                                                      | Mental Health                    | People Living with Condition (mental health disorders)                                                                                                   | Educational, Contact based, Increased access/ outreach for services                             | Positive              | 4                             |
| Norr et al. (2012) <sup>143</sup>       | Chile                                           | Upper-Middle Income                                                                                      | HIV/AIDS                         | Health Professionals                                                                                                                                     | Educational, Contact based                                                                      | Positive              | 4                             |
| Norr et al. (2007) <sup>144</sup>       | Malawi                                          | Low Income                                                                                               | HIV/AIDS                         | Teachers                                                                                                                                                 | Educational                                                                                     | Positive              | 4                             |

|                                                     | Country                                             | Income Group                                                                             | Stigma Context                      | Target Population                                                                                                        | Nature of the intervention                             | Direction of Effect   | Quality Assessment (out of 6) |
|-----------------------------------------------------|-----------------------------------------------------|------------------------------------------------------------------------------------------|-------------------------------------|--------------------------------------------------------------------------------------------------------------------------|--------------------------------------------------------|-----------------------|-------------------------------|
| Nyblade, L., et al. (2020) <sup>145</sup>           | Ghana                                               | Lower-Middle Income                                                                      | HIV/AIDS                            | Healthcare staff from 20 facilities                                                                                      | Educational, Contact based                             | Positive              | 6                             |
| Onileimo, V., et al. (2021) <sup>146</sup>          | Nigeria                                             | Lower-Middle Income                                                                      | Mental Health                       | Paediatric nurses                                                                                                        | Educational, Contact based                             | Positive              | 6                             |
| Perez F. and Dabis F. (2003) <sup>147</sup>         | Colombia                                            | Lower-Middle Income                                                                      | HIV/AIDS                            | Teachers<br>Children and Adolescents                                                                                     | Educational                                            | Positive              | 1                             |
| Pisal et al. (2007) <sup>148</sup>                  | India                                               | Lower-Middle Income                                                                      | HIV/AIDS                            | Health professionals                                                                                                     | Educational, Contact based                             | Positive              | 4                             |
| Potts, L. C. and C. Henderson (2021) <sup>149</sup> | Ghana & Kenya                                       | Lower-Middle Income                                                                      | Mental Health                       | Men and women aged 18-34 years regular users of social media                                                             | Educational, Contact based                             | Positive              | 6                             |
| Praharaj, S. K., et al. (2021) <sup>150</sup>       | India                                               | Lower-Middle Income                                                                      | Mental Health                       | Fifth-semester undergraduate medical students                                                                            | Educational, Contact based                             | No significant effect | 6                             |
| Pufahl, J., et al. (2021) <sup>151</sup>            | India                                               | Lower-Middle Income                                                                      | Gender/Sexuality/<br>Women's Health | Audience aged more than 18 years                                                                                         | Educational                                            | Positive              | 6                             |
| Pulerwitz et al. (2015) <sup>152</sup>              | Ethiopia                                            | Low Income                                                                               | Gender/Sexuality/<br>Women's Health | Men                                                                                                                      | Educational, Contact based                             | Positive              | 4                             |
| Pulerwitz et al. (2015) <sup>153</sup>              | Vietnam                                             | Lower-Middle Income                                                                      | HIV/AIDS                            | Health professionals                                                                                                     | Educational, Contact based                             | Positive              | 3                             |
| Ravindran, A. V., et al. (2018) <sup>154</sup>      | Nicaragua                                           | Lower-Middle Income                                                                      | Mental Health                       | High school and University students 14-25 years                                                                          | Educational, Contact based                             | Positive              | 6                             |
| Saad, A. et al. (2012) <sup>155</sup>               | Nigeria                                             | Lower-Middle Income                                                                      | HIV/AIDS                            | Young Adults                                                                                                             | Educational                                            | Positive              | 4                             |
| Samal, J. and R. K. Dehury (2017) <sup>156</sup>    | India                                               | Lower-Middle Income                                                                      | Tuberculosis                        | 100 households                                                                                                           | Educational, Contact based                             | Positive              | 6                             |
| Schensul, S. L., et al. (2021) <sup>157</sup>       | India                                               | Lower-Middle Income                                                                      | HIV/AIDS                            | HIV positive males who consume alcohol                                                                                   | Counselling/ mentoring/ Case management, Contact based | Positive              | 6                             |
| Shah et al. (2014) <sup>158</sup>                   | India                                               | Lower-Middle Income                                                                      | HIV/AIDS                            | Health Professionals                                                                                                     | Educational, Contact based                             | Positive              | 4                             |
| Sifunda et al. (2008) <sup>159</sup>                | South Africa                                        | Upper-Middle Income                                                                      | HIV/AIDS                            | High Risk Group (Prisoners)                                                                                              | Educational                                            | No significant effect | 3                             |
| Soares et al. (2013) <sup>160</sup>                 | Brazil                                              | Upper-Middle Income                                                                      | Alcohol and Drug Use                | Health Professionals                                                                                                     | Educational                                            | No significant effect | 3                             |
| Sorcar et al. (2009) <sup>161</sup>                 | India                                               | Lower-Middle Income                                                                      | HIV/AIDS                            | Children and Adolescents & Young Adults                                                                                  | Educational                                            | Positive              | 3                             |
| Stiernborg et al. (1996) <sup>162</sup>             | Philippines                                         | Lower-Middle Income                                                                      | HIV/AIDS                            | Health Professionals                                                                                                     | Educational, Contact based                             | No significant effect | 3                             |
| Taher et al. (2011) <sup>163</sup>                  | Egypt                                               | Lower-Middle Income                                                                      | HIV/AIDS                            | Health Professionals                                                                                                     | Educational                                            | Positive              | 4                             |
| Tefera et al. (2013) <sup>164</sup>                 | Ethiopia                                            | Low Income                                                                               | HIV/AIDS                            | High Risk Groups (Sex Workers, Parking Lot Workers, Labourers, Taxi Drivers) and People Living with Condition (HIV/AIDS) | Educational                                            | Positive              | 4                             |
| Teoh et al. (2023) <sup>165</sup>                   | Malaysia                                            | Upper-Middle Income                                                                      | Leprosy                             | Health professionals                                                                                                     | Educational, Contact based                             | Positive              | 5                             |
| Tilahun, D., et al. (2019) <sup>166</sup>           | Ethiopia                                            | Low Income                                                                               | Disability                          | Rural health extension workers (HEW)                                                                                     | Educational, Contact based                             | Positive              | 6                             |
| Uwakwe C.B.U (2000) <sup>167</sup>                  | Nigeria                                             | Low Income                                                                               | HIV/AIDS                            | Health Professionals                                                                                                     | Educational                                            | Negative              | 4                             |
| Uys et al. (2009) <sup>168</sup>                    | Lesotho, Malawi, South Africa, Swaziland & Tanzania | Lower-Middle Income, Low Income, Upper-Middle Income, Lower-Middle Income and Low Income | HIV/AIDS                            | Health Professionals                                                                                                     | Educational, Contact based                             | Positive              | 3                             |
| Van den Broek et al. (1998) <sup>169</sup>          | Tanzania                                            | Low Income                                                                               | Leprosy                             | General Population                                                                                                       | Educational                                            | Positive              | 2                             |
| Wang et al. (2009) <sup>170</sup>                   | China                                               | Upper-Middle Income                                                                      | HIV/AIDS                            | Health Professionals                                                                                                     | Educational                                            | Positive              | 3                             |
| Williams et al. (2006) <sup>171</sup>               | China                                               | Upper-Middle Income                                                                      | HIV/AIDS                            | Health Professionals                                                                                                     | Educational                                            | Positive              | 5                             |
| Worakul et al. (2007) <sup>172</sup>                | Thailand                                            | Lower-Middle Income                                                                      | Mental Health                       | Caregivers of People Living with the Condition (Mental Health)                                                           | Educational                                            | Positive              | 3                             |
| Ye et al. (2009) <sup>173</sup>                     | China                                               | Upper-Middle Income                                                                      | HIV/AIDS                            | Children and Adolescents                                                                                                 | Educational                                            | No significant effect | 2                             |
| Zhang et al. (2013) <sup>174</sup>                  | China                                               | Upper-Middle Income                                                                      | HIV/AIDS                            | High Risk Groups (Internal Chinese Migrants)                                                                             | Counselling/ mentoring/ Case management                | Positive              | 3                             |
| Zhao et al. (2005) <sup>175</sup>                   | China                                               | Upper-Middle Income                                                                      | HIV/AIDS                            | High Risk Groups (Drug User)                                                                                             | Educational, Contact based                             | Positive              | 4                             |

|                                         | Country                   | Income Group               | Stigma Context                   | Target Population                                       | Nature of the intervention                               | Direction of Effect   | Quality Assessment (out of 6) |
|-----------------------------------------|---------------------------|----------------------------|----------------------------------|---------------------------------------------------------|----------------------------------------------------------|-----------------------|-------------------------------|
| <b>Non-Experimental</b>                 |                           |                            |                                  |                                                         |                                                          |                       |                               |
| Berendes et al. (2011) <sup>176</sup>   | Malawi                    | Low Income                 | HIV/AIDS                         | General Population                                      | Educational                                              | Positive              | 5                             |
| Blanchard et al. (2013) <sup>177</sup>  | India                     | Lower-Middle Income        | HIV/AIDS                         | High Risk Groups (Female Sex Workers)                   | Social activism, Increased access/ outreach for services | Positive              | 4                             |
| Geary et al. (2007) <sup>178</sup>      | Brazil, Nepal and Senegal | Upper Middle<br>Low<br>Low | HIV/AIDS                         | General Population                                      | Not described                                            | Positive              | 2                             |
| Keating et al. (2006) <sup>179</sup>    | Nigeria                   | Low Income                 | HIV/AIDS                         | General Population                                      | Educational                                              | Positive              | 5                             |
| Lapinski et al. (2008) <sup>180</sup>   | Nigeria                   | Lower-Middle Income        | HIV/AIDS                         | General Population                                      | Educational, Contact based                               | Positive              | 3                             |
| Mall et al. (2013) <sup>181</sup>       | South Africa              | Upper-Middle Income        | HIV/AIDS                         | General Population                                      | Educational, Increased access/ outreach for services     | Positive              | 3                             |
| Manyedi et al. (2010) <sup>182</sup>    | South Africa              | Upper-Middle Income        | HIV/AIDS                         | People Living With the Condition (HIV Patients)         | Counselling/ mentoring/ Case management                  | Positive              | 3                             |
| Mashimo et al. (2001) <sup>183</sup>    | Thailand                  | Lower-Middle Income        | HIV/AIDS                         | General Population                                      | Educational                                              | Positive              | 1                             |
| Márquez-Cervantes <sup>184</sup>        | Mexico                    | Upper-Middle Income        | Mental Health                    | Medical students in fifth year                          | Educational, Contact based                               | Positive              | 3                             |
| Maulik et al. (2019) <sup>185</sup>     | India                     | Lower-Middle Income        | Mental Health                    | Rural communities                                       | Education, Contact based                                 | Positive              | 5                             |
| Nambiar et al. (2011) <sup>186</sup>    | India                     | Lower-Middle Income        | HIV/AIDS                         | People Living With the Condition (HIV Patients)         | Educational                                              | Positive              | 3                             |
| Peltzer et al. (2012) <sup>187</sup>    | South Africa              | Upper-Middle Income        | HIV/AIDS                         | General Population                                      | Educational                                              | Positive              | 2                             |
| Powel and Qushua. (2023) <sup>188</sup> | Syria                     | Low Income                 | Mental Health                    | Jordanians and resettled Syrians of both sexes          | Educational, Contact based                               | Positive              | 6                             |
| Sanhori et al. (2019) <sup>189</sup>    | Sudan                     | Lower-Middle Income        | Mental Health                    | All adults aged 18 and above, living in the study areas | Educational, Contact based                               | No significant effect | 5                             |
| Takahashi et al. (2009) <sup>190</sup>  | Cambodia                  | Low Income                 | HIV/AIDS                         | General Population                                      | Educational                                              | Not applicable        | 0                             |
| West, K. (2016) <sup>191</sup>          | Jamaica                   | Upper-Middle Income        | Gender/Sexuality/ Women's Health | General Population                                      | Social activism                                          | Positive              | 2                             |
| Zunyo et al. (2002) <sup>192</sup>      | China                     | Upper-Middle Income        | HIV/AIDS                         | Health Professionals & General Population               | Educational                                              | Positive              | 4                             |

## References:

- Adam MB. Effectiveness trial of community-based I Choose Life-Africa human immunodeficiency virus prevention program in Kenya. *The American journal of tropical medicine and hygiene*. 2014;91(3):645-8.
- Bayar MR, Poyraz BC, Aksoy-Poyraz C, Arikan MK. Reducing mental illness stigma in mental health professionals using a web-based approach. *Isr J Psychiatry Relat Sci*. 2009;46(3):226-30.
- Bhana A, Mellins CA, Petersen I, Alicea S, Myeza N, Holst H, et al. The VUKA family program: Piloting a family-based psychosocial intervention to promote health and mental health among HIV infected early adolescents in South Africa. *AIDS care*. 2014;26(1):1-11.
- Bond V, Floyd S, Fenty J, Schaap A, Godfrey-Faussett P, Claassens M, et al. Secondary analysis of tuberculosis stigma data from a cluster randomised trial in Zambia and South Africa (ZAMSTAR). *Int J Tuberc Lung Dis*. 2017;21(11):49-59.
- Bruneau EG, Saxe R. The power of being heard: The benefits of 'perspective-giving' in the context of intergroup conflict. *Journal of experimental social psychology*. 2012;48(4):855-66.
- Clair V, Rossa-Roccor V, Mutiso V, Rieder S, Musau A, Frank E, Ndeti D. Blended-eLearning Impact on Health Worker Stigma Toward Alcohol, Tobacco, and Other Psychoactive Substance Users. *International Journal of Mental Health and Addiction*. 2022.
- de Vargas D. The impact of clinical experience with alcoholics on Brazilian nursing students' attitudes toward alcoholism and associated problems. *Journal of addictions nursing*. 2013;24(3):180-6.
- Denison JA, Burke VM, Miti S, Nonyane BAS, Frimpong C, Merrill KG, et al. Project YES! Youth Engaging for Success: A randomized controlled trial assessing the impact of a clinic-based peer mentoring program on viral suppression, adherence and internalized stigma among HIV-positive youth (15-24 years) in Ndola, Zambia. *PLoS ONE [Electronic Resource]*. 2020;15(4):e0230703.



9. Ergene T, Cok F, TÜMer A, ÜNal S. A Controlled-Study of Preventive Effects of Peer Education and Single-Session Lectures on HIV/AIDS Knowledge and Attitudes among University Students in Turkey. *AIDS education and prevention*. 2005;17(3):268-78.
10. Fernandez A, Tan K-A, Knaak S, Chew BH, Ghazali SS. Effects of Brief Psychoeducational Program on Stigma in Malaysian Pre-clinical Medical Students: A Randomized Controlled Trial. *Academic psychiatry*. 2016;40(6):905-11.
11. Ghaemi SZ, Rostambeigi P, Roshandel A. Assessment and comparison of the effects of lecture and pamphlet health education methods in the fields of AIDS on knowledge and attitude of university students. 2013.
12. Han M, Wang Y, Zhang Y, Wang Y, Ou J, Ren D, et al. A multicomponent digital intervention to promote help-seeking for mental health problems and suicide in sexual and gender diverse young adults: A randomized controlled trial. *PLoS Med*. 2023;20(3):e1004197.
13. Islam A, Pakrashi D, Vlassopoulos M, Wang LC. Stigma and misconceptions in the time of the COVID-19 pandemic: A field experiment in India. *Social Science & Medicine*. 2021;278:N.PAG-N.PAG.
14. Kaljee L, Zhang LY, Langhaug L, Munjile K, Tembo S, Menon A, et al. A randomized-control trial for the teachers' diploma programme on psychosocial care, support and protection in Zambian government primary schools. *Psychology Health & Medicine*. 2017;22(4):381-92.
15. Kutcher S, Perkins K, Gilberts H, Udedi M, Ubuguyu O, Njau T, et al. Creating evidence-based youth mental health policy in sub-Saharan Africa: A description of the integrated approach to addressing the issue of youth depression in Malawi and Tanzania. *Frontiers in Psychiatry Vol 10 2019, ArtID 542*. 2019;10.
16. Larsen MM, Casey SE, Sartie M-T, Tommy J, Musa T, Saldinger M. Changes in HIV/AIDS/STI Knowledge, Attitudes and Practices among Commercial Sex Workers and Military Forces in Port Loko, Sierra Leone: Changes in HIV/AIDS/STI KAP in Sierra Leone. *Disasters*. 2004;28(3):239-54.
17. Li J, Li J, Thornicroft G, Yang H, Chen W, Huang Y. Training community mental health staff in Guangzhou, China: evaluation of the effect of a new training model. *BMC Psychiatry*. 2015;15(1):263.
18. Lin Z, Cheng L, Han X, Wang H, Liao Y, Guo L, et al. The Effect of Internet-Based Cognitive Behavioral Therapy on Major Depressive Disorder: randomized Controlled Trial. *J Med Internet Res*. 2023;25:e42786.
19. Logie CH, Okumu M, Berry I, Hakiza R, Baral SD, Musoke DK, et al. Findings from the Tushirikiane mobile health (mHealth) HIV self-testing pragmatic trial with refugee adolescents and youth living in informal settlements in Kampala, Uganda. *Journal of the International AIDS Society*. 2023;26(10):e26185.
20. Masquillier C, Wouters E, Mortelmans D, le Roux Booysen F. The Impact of Community Support Initiatives on the Stigma Experienced by People Living with HIV/AIDS in South Africa. *AIDS and behavior*. 2015;19(2):214-26.
21. Mockiene V, Suominen T, Välimäki M, Razbadauskas A, Caplinskas S, Martinkenas A. Nurses' willingness to take care of people living with human immunodeficiency virus/acquired immunodeficiency syndrome (HIV/AIDS) — does a teaching intervention make a difference? *Nurse Education Today*. 2011;31(6):617-22.
22. Ngoc TN, Weiss B, Trung LT. Effects of the family schizophrenia psychoeducation program for individuals with recent onset schizophrenia in Viet Nam. *Asian journal of psychiatry*. 2016;22:162-6.
23. Oduguwa AO, Adedokun B, Omigbodun OO. Effect of a mental health training programme on Nigerian school pupils' perceptions of mental illness. *Child and adolescent psychiatry and mental health*. 2017;11(1):19-.
24. Rice RE, Wu Z, Li L, Detels R, Rotheram-Borus MJ. Reducing STD/HIV Stigmatizing Attitudes Through Community Popular Opinion Leaders in Chinese Markets. *Human communication research*. 2012;38(4):379-405.
25. Russell PS, al John JK, Lakshmanan JL. Family intervention for intellectually disabled children. Randomised controlled trial. *British journal of psychiatry*. 1999;174(3):254-8.
26. Santana RT, Monzon OT, Mandel J, Hall TL, Hearst N. AIDS education for hospital workers in Manila : effects on knowledge, attitudes, and infection control practices. *AIDS (London)*. 1992;6(11):1359-63.
27. Techapoonpon K, Wonglertwisawakorn C, Kerdchareon N, Pruttithavorn W, Srikhamdokkhae O. Can a brief session of the online coronavirus disease 2019 destigmatization program reduce stigma among survivors? A randomized controlled trial. *Frontiers in Psychiatry*. 2023;14.
28. Tergesen CL, Gurung D, Dhungana S, Risal A, Basel P, Tamrakar D, et al. Impact of Service User Video Presentations on Explicit and Implicit Stigma toward Mental Illness among Medical Students in Nepal: A Randomized Controlled Trial. *International Journal of Environmental Research & Public Health [Electronic Resource]*. 2021;18(4):22.
29. Vasiljevic M, Crisp RJ. Tolerance by surprise: evidence for a generalized reduction in prejudice and increased egalitarianism through novel category combination. *PloS one*. 2013;8(3):e57106-e.
30. Vazquez Guillamet LJ, Babey MM, Njah M, Blake H, Jasani A, Kyeng R, et al. Acceptability, feasibility and potential of an intervention using secret Facebook groups to complement existing HIV prevention strategies among female sex workers in Cameroon, a randomized pilot study. *AIDS care - psychological and socio-medical aspects of AIDS/HIV*. 2023.
31. Vogt S, Mohmmmed Zaid NA, El Fadil Ahmed H, Fehr E, Efferson C. Changing cultural attitudes towards female genital cutting. *Nature (London)*. 2016;538(7626):506-9.
32. West K, Husnu S, Lipps G. Imagined Contact Works in High-Prejudice Contexts: Investigating Imagined Contact's Effects on Anti-Gay Prejudice in Cyprus and Jamaica. *Sexuality research & social policy*. 2015;12(1):60-9.

33. Wingood GM, Reddy P, Lang DL, Saleh-Onoya D, Braxton N, Sifunda S, DiClemente RJ. Efficacy of SISTA South Africa on Sexual Behavior and Relationship Control Among isiXhosa Women in South Africa: Results of a Randomized-Controlled Trial. *Journal of acquired immune deficiency syndromes (1999)*. 2013;63 Suppl 1(Supplement 1):S59-S65.
34. Wu S, Li L, Wu Z, Liang L-J, Cao H, Yan Z, Li J. A brief HIV stigma reduction intervention for service providers in China. *AIDS patient care and STDs*. 2008;22(6):513-20.
35. Yang LH, Eschliman EL, Mehta H, Misra S, Poku OB, Entaile P, et al. A pilot pragmatic trial of a "what matters most"-based intervention targeting intersectional stigma related to being pregnant and living with HIV in Botswana. *AIDS research and therapy*. 2022;19(1):26-.
36. Aplasca MR, Siegel D, Mandel JS, Santana-Arciaga RT, Paul J, Hudes ES, et al. Results of a model AIDS prevention program for high school students in the Philippines. *AIDS (London)*. 1995;9 Suppl 1:S7-13.
37. Arthur YA, Boardman GH, Morgan AJ, McCann TV. Cluster randomised controlled trial of a problem-solving, Story-bridge mental health literacy programme for improving Ghanaian community leaders' knowledge of depression. *Journal of Mental Health*. 2020.
38. Arthur YA, Boardman GH, Morgan AJ, McCann TV. Effectiveness of a Problem-Solving, Story-Bridge Mental Health Literacy Programme in Improving Ghanaian Community Leaders' Attitudes towards People with Mental Illness: A Cluster Randomised Controlled Trial. *Issues Ment Health Nurs*. 2021;42(4):332-45.
39. Cáceres CF, Rosasco AM, Mandel JS, Hearst N. Evaluating a school-based intervention for STD/AIDS prevention in Peru. *Journal of adolescent health*. 1994;15(7):582-91.
40. Chongruksa D, Prinyapol P. Efficacy of group counselling on multicultural awareness and respect among Thai Buddhist and Thai Muslim students. *Counselling psychology quarterly*. 2011;24(3):181-93.
41. Dey S, Ganguli B, Khemka GC, Roy SD, Roy L, Chakrabartty A, et al. Understanding of mental health-related stigma among people in urban Kolkata. *Journal of Mental Health and Human Behaviour*. 2020;25(2):106-12.
42. Dijkstra LG, Weiss HA, Birhane R, Medhin G, Silva M, Hanlon C, et al. Effects of community-based rehabilitation on caregivers of people with schizophrenia in Ethiopia in the RISE trial. 2023.
43. Doherty T, Tabana H, Jackson D, Naik R, Zembe W, Lombard C, et al. Effect of home based HIV counselling and testing intervention in rural South Africa: cluster randomised trial. *BMJ (Online)*. 2013;346(7915):14-.
44. Green DP, Groves DW, Manda C. A Radio Drama's Effects on HIV Attitudes and Policy Priorities: A Field Experiment in Tanzania. *Health Education & Behavior*. 2021;48(6):842-51.
45. Harvey B, Stuart J, Swan T. Evaluation of a Drama-in-Education Programme to Increase AIDS Awareness in South African High Schools: A Randomized Community Intervention Trial. *International journal of STD & AIDS*. 2000;11(2):105-11.
46. Jürgensen M, Sandøy IF, Michelo C, Fylkesnes K. Effects of home-based Voluntary Counselling and Testing on HIV-related stigma: Findings from a cluster-randomized trial in Zambia. *Social science & medicine (1982)*. 2013;81:18-25.
47. Kohrt BA, Jordans MJD, Turner EL, Rai S, Gurung D, Dhakal M, et al. Collaboration With People With Lived Experience of Mental Illness to Reduce Stigma and Improve Primary Care Services: A Pilot Cluster Randomized Clinical Trial. *JAMA Network Open*. 2021;4(11):e2131475.
48. Li L, Hien NT, Liang L-J, Lin C, Lan C-W, Lee S-J, et al. Efficacy of Communication Training of Community Health Workers on Service Delivery to People Who Inject Drugs in Vietnam: A Clustered Randomized Trial. *American journal of public health (1971)*. 2018;108(6):791-8.
49. Li LI, Jihui G, Liang L-J, Chunqing LIN, Zunyou WU. Popular Opinion Leader Intervention for HIV Stigma Reduction in Health Care Settings. *AIDS education and prevention*. 2013;25(4):327-35.
50. Li LI, Zunyou WU, Liang L-J, Chunqing LIN, Jihui G, Manhong JIA, et al. Reducing HIV-Related Stigma in Health Care Settings: A Randomized Controlled Trial in China. *American journal of public health (1971)*. 2013;103(2):286-92.
51. Li L, Liang L-J, Lin C, Wu Z. Addressing HIV stigma in protected medical settings. *AIDS care*. 2015;27(12):1439-42.
52. Li L, Wu Z, Liang L-J, Lin C, Zhang L, Guo S, et al. An intervention targeting service providers and clients for methadone maintenance treatment in China: a cluster-randomized trial. *Addiction (Abingdon, England)*. 2013;108(2):356-66.
53. Li L, Lin C, Guan J. Using standardized patients to evaluate hospital-based intervention outcomes. *International journal of epidemiology*. 2014;43(3):897-903.
54. Li L, Liang L-J, Wu Z, Lin C, Guan J. Assessing outcomes of a stigma-reduction intervention with venue-based analysis. *Social Psychiatry and Psychiatric Epidemiology*. 2014;49(6):991-9.
55. Liu J, Calzavara L, Mendelsohn JB, O'Leary A, Kang L, Pan Q, et al. Impact evaluation of a community-based intervention to reduce risky sexual behaviour among female sex workers in Shanghai, China. *BMC Public Health*. 2015;15(1):147-.
56. Low C, Pop-Eleches C, Rono W, Plous E, Kirk A, Ndege S, et al. The effects of home-based HIV counseling and testing on HIV/AIDS stigma among individuals and community leaders in western Kenya: Evidence from a cluster-randomized trial. *AIDS Care*. 2013;25(sup1):S97-S107.
57. Paluck EL, Green DP. Deference, Dissent, and Dispute Resolution: An Experimental Intervention Using Mass Media to Change Norms and Behavior in Rwanda. *The American political science review*. 2009;103(4):622-44.

58. Paluck EL. Reducing Intergroup Prejudice and Conflict Using the Media: A Field Experiment in Rwanda. *Journal of personality and social psychology*. 2009;96(3):574-87.
59. Peltzer K, Simbayi L, Banyini M, Kekana Q. HIV Risk Reduction Intervention Among Traditionally Circumcised Young Men in South Africa: A Cluster Randomized Control Trial. *The Journal of the Association of Nurses in AIDS Care*. 2011;22(5):397-406.
60. Peltzer K, Simbayi L, Banyini M, Kekana Q. HIV Risk Reduction Intervention Among Medically Circumcised Young Men in South Africa: A Randomized Controlled Trial. *International journal of behavioral medicine*. 2012;19(3):336-41.
61. Pereira CA, Wen CL, Miguel EC, Polanczyk GV. A randomised controlled trial of a web-based educational program in child mental health for schoolteachers. *European child & adolescent psychiatry*. 2015;24(8):931-40.
62. Peters RMH, Zweekhorst MBM, Bunders-Aelen JGF, van Brakel WH. A Cluster-Randomized Controlled Intervention Study to Assess the Effect of a Contact Intervention in Reducing Leprosy-Related Stigma in Indonesia. *PLoS neglected tropical diseases*. 2015;9(10):e0004003-e.
63. Ran M-S, Xiang M-Z, Lai-Wan Chan C, Leff J, Simpson P, Huang M-S, et al. Effectiveness of psychoeducational intervention for rural Chinese families experiencing schizophrenia: A randomised controlled trial. *Social psychiatry and psychiatric epidemiology*. 2003;38(2):69-75.
64. Totic S, Stojiljković D, Pavlovic Z, Zaric N, Zarkovic B, Malic L, et al. Stigmatization of 'psychiatric label' by medical and non-medical students. *International journal of social psychiatry*. 2012;58(5):455-62.
65. Wilke AM, Green DP, Cooper J. A placebo design to detect spillovers from an education-entertainment experiment in Uganda. *Journal of the Royal Statistical Society Series a-Statistics in Society*. 2020;183(3):1075-96.
66. Young SD, Konda K, Caceres C, Galea J, Sung-Jae L, Salazar X, Coates T. Effect of a Community Popular Opinion Leader HIV/STI Intervention on Stigma in Urban, Coastal Peru. *AIDS and behavior*. 2011;15(5):930-7.
67. Adelekan ML, Makanjuola AB, Ndom RJ. Traditional mental health practitioners in Kwara State, Nigeria. *East Afr Med J*. 2001;78(4):190-6.
68. Ajuwon GA, Komolafe-Opadeji HO, Ikhizama B. Librarian-Initiated HIV/AIDS Prevention Intervention Program Outcome in Rural Communities in Oyo State, Nigeria. *International quarterly of community health education*. 2014;34(4):367-90.
69. Akuiyibo S, Anyanti J, Idogho O, Piot S, Amoo B, Nwankwo N, Anosike N. Impact of peer education on sexual health knowledge among adolescents and young persons in two North Western states of Nigeria. *Reprod Health*. 2021;18(1):204.
70. Al Ramiah A, Hewstone M. 'Rallying around the flag': Can an intergroup contact intervention promote national unity? *British journal of social psychology*. 2012;51(2):239-56.
71. Al-Iryani B, Basaleem H, Al-Sakkaf K, Crutzen R, Kok G, van den Borne B. Evaluation of a school-based HIV prevention intervention among Yemeni adolescents. *BMC Public Health*. 2011;11(1):279-.
72. Apinundecha C, Laohasiriwong W, Cameron MP, Lim S. A community participation intervention to reduce HIV/AIDS stigma, Nakhon Ratchasima province, northeast Thailand. *AIDS care*. 2007;19(9):1157-65.
73. Armstrong G, Kermode M, Raja S, Suja S, Chandra P, Jorm AF. A mental health training program for community health workers in India: impact on knowledge and attitudes. *International journal of mental health systems*. 2011;5(1):17-.
74. Artawan Eka Putra IWG, Purnama Dewi NPE, Probandari AN, Notobroto HB, Wahyuni C. The Implementation of Comprehensive Health Education to Improve Household Contacts' Participation in Early Detection of Tuberculosis. *Health Educ Behav*. 2023;50(1):136-43.
75. Bahrami R, Khalifi T. The Effect of Psycho-education on the Affiliate Stigma in Family Caregivers of People with Bipolar Disorder. *Sage Open Nursing*. 2022;8.
76. Balfour L, Farrar T, McGilvray M, Wilson D, Tasca GA, Spaans JN, et al. HIV Prevention in Action on the Football Field: The Whizzkids United Program in South Africa. *AIDS and behavior*. 2013;17(6):2045-52.
77. Balogun M, Sekoni A, Meloni ST, Odukoya O, Onajole A, Longe-Peters O, et al. Trained community volunteers improve tuberculosis knowledge and attitudes among adults in a periurban community in southwest Nigeria. *The American journal of tropical medicine and hygiene*. 2015;92(3):625-32.
78. Bandopadhyay N, Woelk GB, Kieffer MP, Mpofu D, the Project ASG, Woelk G, et al. Project ACCLAIM: Intervention Effect on Community Knowledge, Attitudes and Beliefs of Maternal and Child Health and HIV/AIDS in Eswatini, Uganda and Zimbabwe. *AIDS & Behavior*. 2021;25(8):2400-9.
79. Baptiste DR, Bhana A, Petersen I, McKay M, Voisin D, Bell C, Martinez DD. Community Collaborative Youth-Focused HIV/AIDS Prevention in South Africa and Trinidad: Preliminary Findings. *Journal of pediatric psychology*. 2006;31(9):905-16.
80. Bekele A, Ali A. Effectiveness of IEC interventions in reducing HIV/AIDS related stigma among high school adolescents in Hawassa, Southern Ethiopia. *The Ethiopian Journal of Health Development*. 2016;22(3).
81. Bella-Awusah T, Adedokun B, Dogra N, Omigbodun O. The impact of a mental health teaching programme on rural and urban secondary school students' perceptions of mental illness in southwest Nigeria. *Journal of child and adolescent mental health*. 2014;26(3):207-15.
82. Bichoualne A, Oubibi M, Rong Y. The impact of mental health literacy intervention on in-service teachers' knowledge attitude and self-efficacy. *Global Mental Health Vol 10, 2023, ArtID e88*. 2023;10.

83. Bilali R, Vollhardt JR, Rarick JRD. Assessing the Impact of a Media-based Intervention to Prevent Intergroup Violence and Promote Positive Intergroup Relations in Burundi. *Journal of community & applied social psychology*. 2016;26(3):221-35.
84. Bitta MA, Baariu J, Grassi S, Kariuki SM, Lennox B, Newton CRJC. Effectiveness of participatory video in lowering stigma against people with mental, neurological and substance use disorders in Kenya. *BJPsych Open*. 2023;9(6):e215.
85. Boon H, Ruiter RAC, James S, van den Borne HW, Williams E, Reddy P. The impact of a community-based pilot health education intervention for older people as caregivers of orphaned and sick children as a result of HIV and AIDS in South Africa. *Journal of Cross-Cultural Gerontology*. 2009;24(4):373-89.
86. Brick K, Cooper JL, Mason L, Faeflen S, Monmia J, Dubinsky JM. Training-of-trainers neuroscience and mental health teacher education in Liberia improves self-reported support for students. *Frontiers in Human Neuroscience Vol 15 2021, ArtID 653069*. 2021;15.
87. Bu DR, Han Z, Zhang CQ, Liu JD, Huang ZJ, Liang W, et al. The effect of a mental health literacy intervention on Chinese team officials and staff in elite sports: a two-arm non-randomised controlled trial. *International Journal of Sport and Exercise Psychology*. 2023.
88. Cheng YPD, Lou C-HMD, Mueller LMMA, Zhao S-LPD, Yang J-HPD, Tu X-WPD, Gao E-SMD. Effectiveness of a School-Based AIDS Education Program among Rural Students in HIV High Epidemic Area of China. *Journal of adolescent health*. 2008;42(2):184-91.
89. Cheneville T, Gabbidon K, Drake H, Rodriguez L. Preliminary Findings From the HIV SEERs Project: A Community-Based Participatory Research Program to Reduce HIV Stigma Among Youth in Kenya. *Journal of the Association of Nurses in AIDS Care*. 2019;30(4):462-73.
90. Cherian L, Maphoso LS. Measurement of the effectiveness of an HIV/AIDS intervention programme on knowledge, attitudes, and behaviour of the South African Police Service employees. *Curationis*. 2009;32(4):4-18.
91. Chi X, Hawk ST, Winter S, Meeus W, Leerstoel M, Adolescent development C, determinants. The effect of comprehensive sexual education program on sexual health knowledge and sexual attitude among college students in Southwest China. *Asia-Pacific journal of public health*. 2015;27(2):NP2049-NP66.
92. Chidrawi HC, Greeff M, Temane QM. Health behaviour change of people living with HIV after a comprehensive community-based HIV stigma reduction intervention in North-West Province in South Africa. *SAHARA J : journal of Social Aspects of HIV/AIDS Research Alliance*. 2014;11(1):222-32.
93. Chimwaza AF, Chimango JL, Kaponda CPN, Norr KF, Norr JL, Jere DL, Kachingwe SI. Changes in clients' care ratings after HIV prevention training of hospital workers in Malawi. *International journal for quality in health care*. 2012;24(2):152-60.
94. Colchero MA, Bautista-Arredondo S, Cortés-Ortiz MA, Romero-Martinez M, Salas J, Sosa-Rubí SG, Uribe P. Impact and economic evaluations of a combination prevention programme for men who have sex with men in Mexico. *AIDS (London)*. 2016;30(2):293-300.
95. Cole CF, Arafat C, Tidhar C, Tafesh WZ, Fox NA, Killen M, et al. The educational impact of Rechov Sumsum/Shara'a Simsim: A Sesame Street television series to promote respect and understanding among children living in Israel, the West Bank, and Gaza. *International journal of behavioral development*. 2003;27(5):409-22.
96. Costa AB, Pase PF, de Camargo ES, Guaranha C, Caetano AH, Kveller D, et al. Effectiveness of a multidimensional web-based intervention program to change Brazilian health practitioners' attitudes toward the lesbian, gay, bisexual and transgender population. *Journal of health psychology*. 2016;21(3):356-68.
97. Creel AH, Rimal RN, Mkandawire G, Böse K, Brown JW. Effects of a mass media intervention on HIV-related stigma: 'Radio Diaries' program in Malawi. *Health education research*. 2011;26(3):456-65.
98. da Silva Cais CF, da Silveira IU, Stefanello S, Botega NJ. Suicide Prevention Training for Professionals in the Public Health Network in a Large Brazilian City. *Archives of suicide research*. 2011;15(4):384-9.
99. Denison JA, Tsui S, Bratt J, Torpey K, Weaver MA, Kabaso M. Do peer educators make a difference? An evaluation of a youth-led HIV prevention model in Zambian Schools. *Health education research*. 2012;27(2):237-47.
100. de Lemus S, Navarro L, J. Velásquez M, Ryan E, Megías JL. From Sex to Gender: A University Intervention to Reduce Sexism in Argentina, Spain, and El Salvador: From Sex to Gender. *Journal of social issues*. 2014;70(4):741-62.
101. Devarayasamudram S, De Gagne JC, Kurudi NP, Kang HS. Effectiveness of a Structured Teaching Program on Knowledge and Attitudes Toward HIV among Young Women in India. *Journal of Community Health Nursing*. 2018;35(2):49-56.
102. Edwards N, Kaseje D, Kahwa E, Klopper HC, Mill J, Webber J, et al. The impact of leadership hubs on the uptake of evidence-informed nursing practices and workplace policies for HIV care: a quasi-experimental study in Jamaica, Kenya, Uganda and South Africa. *Implementation Science : IS*. 2016;11(1):110-.
103. Esen Danacı A, Balıkcı K, Aydın O, Cengisiz C, Uykur AB. The Effect of Medical Education on Attitudes Towards Schizophrenia: A Five-Year follow-Up Study. *Türk psikiyatri dergisi*. 2016;27(3):176-84.
104. Ezedinachi ENU, Ross MW, Meremiku M, Essien EJ, Edem CB, Ekure E, Ita O. The impact of an intervention to change health workers' HIV/AIDS attitudes and knowledge in Nigeria: a controlled trial. *Public Health*. 2002;116(2):106-12.
105. Fawole IO, Asuzu MC, Oduntan SO, Brieger WR. A school-based AIDS education programme for secondary school students in Nigeria: a review of effectiveness. *Health education research*. 1999;14(5):675-83.

106. Fawzi MCS, Eustache E, Oswald C, Surkan P, Louis E, Scanlan F, et al. Psychosocial Functioning Among HIV-Affected Youth and Their Caregivers in Haiti: Implications for Family-Focused Service Provision in High HIV Burden Settings. *AIDS Patient Care and STDs*. 2010;24(3):147-58.
107. Smith Fawzi MC, Eustache E, Oswald C, Louis E, Surkan PJ, Scanlan F, et al. Psychosocial support intervention for HIV-affected families in Haiti: Implications for programs and policies for orphans and vulnerable children. *Social science & medicine (1982)*. 2012;74(10):1494-503.
108. Figueroa ME, Poppe P, Carrasco M, Pinho MD, Massingue F, Tanque M, Kwizera A. Effectiveness of Community Dialogue in Changing Gender and Sexual Norms for HIV Prevention: Evaluation of the Tchova Tchova Program in Mozambique. *Journal of Health Communication*. 2016;21(5):554-63.
109. Gao X, Wu Y, Zhang Y, Zhang N, Tang J, Qiu J, et al. Effectiveness of School-based Education on HIV/AIDS Knowledge, Attitude, and Behavior among Secondary School Students in Wuhan, China. *PLoS ONE*. 2012;7(9):e44881-e.
110. Geetha M, Shwetha C, Sangeetha M, Sheela S. PRE-POST COMPARISON OF STUTTERING AWARENESS PROGRAM AMONG PROSPECTIVE TEACHERS: A PRELIMINARY STUDY. *Journal of the All India Institute of Speech & Hearing*. 2012;31.
111. Geibel SPDMPH, Hossain SMIMBBSMPH, Pulerwitz JSD, Sultana NMPS, Hossain TMSS, Roy SMS, et al. Stigma Reduction Training Improves Healthcare Provider Attitudes Toward, and Experiences of, Young Marginalized People in Bangladesh. *Journal of adolescent health*. 2017;60(2):S35-S44.
112. Giuliano L, Cicero CE, Padilla S, Mayaregua DR, Villarreal WMC, Sofia V, et al. Knowledge, stigma, and quality of life in epilepsy: Results before and after a community-based epilepsy awareness program in rural Bolivia. *Epilepsy & Behavior*. 2019;92:90-7.
113. Gonzalez-Bernal JJ, Eiguren-Munitis L, Gonzalez-Santos J, Santamaria-Pelaez M, Soto-Camara R, Rodriguez-Fernandez P. Effectiveness of Community Occupational Therapy Intervention in, with and from the Community in People with Disabilities in Azrou (Morocco). *International Journal of Environmental Research & Public Health [Electronic Resource]*. 2021;18(11):24.
114. Goswami P, Ghosh J. Alleviating Help-Seeking Stigma Among Depressed College Students Through Shadow Social Marketing: A Meso-Level Intervention to a Wicked Problem. *Social Marketing Quarterly*. 2024;15245004231225457.
115. Gupta PK, Pore P, Patil U. HIV/AIDS Related KAP Among High-School Students of Municipal Corporation School in Pune - An Interventional Study. *National Journal of Community Medicine*. 2012;3(01):74-9.
116. He L, Lu Z, Huang J, Zhou Y, Huang J, Bi Y, Li J. An Integrated Intervention for Increasing Clinical Nurses' Knowledge of HIV/AIDS-Related Occupational Safety. *International Journal of Environmental Research and Public Health*. 2016;13(11):1094.
117. Hearst MO, Adelli R, Hepperlen R, Biggs J, DeGracia D, Ngulube E, et al. Community-based intervention to reduce stigma for children with disabilities in Lusaka, Zambia: a pilot. *Disability and Rehabilitation*. 2022;44(11):2295-304.
118. Iheanacho T, Marienfeld C, Stefanovics E, Rosenheck RA. Attitudes Toward Mental Illness and Changes Associated with a Brief Educational Intervention for Medical and Nursing Students in Nigeria. *Academic psychiatry*. 2014;38(3):320-4.
119. Iwu CA, Uwakwe K, Oluoha U, Duru C, Nwaigbo E. Empowering traditional birth attendants as agents of maternal and neonatal immunization uptake in Nigeria: a repeated measures design. *BMC Public Health*. 2021;21(1):287.
120. Jacobi CA, Atanga PN, Bin LK, Fru AJC, Eppel G, Mbome VN, et al. "My Friend with HIV Remains a Friend": HIV/AIDS Stigma Reduction through Education in Secondary Schools-A Pilot Project in Buea, Cameroon. *Journal of the International Association of Providers of AIDS Care*. 2020;19:2325958219900713.
121. Jafari A, Yazdani R, Khami MR, Mohammadi M, Hajiabdolbaghi M. Effect of an Educational Course at an Iranian Dental School on Students' Knowledge of and Attitudes About HIV/AIDS. *Journal of dental education*. 2012;76(6):792-9.
122. Jain A, Nuankaew R, Mongkolwiboolphol N, Banpabuth A, Tuvinin R, Oranop na Ayuthaya P, Richter K. Community-based interventions that work to reduce HIV stigma and discrimination: results of an evaluation study in Thailand. *Journal of the International AIDS Society*. 2013;16(3 Suppl 2):18711-n/a.
123. Jewkes R, Gibbs A, Jama-Shai N, Willan S, Misselhorn A, Mushinga M, et al. Stepping Stones and Creating Futures intervention: shortened interrupted time series evaluation of a behavioural and structural health promotion and violence prevention intervention for young people in informal settlements in Durban, South Africa. *BMC Public Health*. 2014;14(1):1325-.
124. Junqueira MAdB, Rassool GH, Santos MAd, Pillon SC. The Impact of an Educational Program in Brief Interventions for Alcohol Problems on Undergraduate Nursing Students: A Brazilian Context. *Journal of addictions nursing*. 2015;26(3):129-35.
125. Kaponda CPN, Jere DL, Chimango JL, Chimwaza AF, Crittenden KS, Kachingwe SI, et al. Impacts of a Peer-Group Intervention on HIV-Related Knowledge, Attitudes, and Personal Behaviors for Urban Hospital Workers in Malawi. *The Journal of the Association of Nurses in AIDS Care*. 2009;20(3):230-42.
126. Kaponda CPN, Norr KF, Crittenden KS, Norr JL, McCreary LL, Kachingwe SI, et al. Outcomes of an HIV Prevention Peer Group Intervention for Rural Adults in Malawi. *Health education & behavior*. 2011;38(2):159-70.
127. Kohrt BA, Blasingame E, Compton MT, Dakana SF, Dossen B, Lang F, et al. Adapting the Crisis Intervention Team (CIT) model of police-mental health collaboration in a low-income, post-conflict country: curriculum development in Liberia, West Africa. *American journal of public health (1971)*. 2015;105(3):e73-e80.

128. Kraft JM, Hill Z, Membe I, Zhang Y, Meassick EO, Monsour M, et al. Effects of the Gama Cuulu Radio Serial Drama on HIV-Related Behavior Change in Zambia. *Journal of health communication*. 2012;17(8):929-45.
129. Kumari S, Joseph J, Singh B. Nurse-led brief psycho-education on self-stigma among clients with schizophrenia and affective disorders:-Solomon four-group design. *Applied Nursing Research*. 2023;69:151657.
130. Lalani M, Bhutta SM. Reducing attitudes of prejudice and discrimination through literature: a quasi-experiment on the upper key-stage 2 students of the British schools in Karachi, Pakistan. *Intercultural Education*. 2019;30(1):83-100.
131. Levav I, Kohn R, Montoya I, Palacio C, Rozic P, Solano IDA, et al. Training Latin American primary care physicians in the WPA module on depression: results of a multicenter trial. *Psychological medicine*. 2005;35(1):35-45.
132. Levy M, Duffy M, Pearson J, Akuno J, Oduong S, Yemaneberhan A, et al. Health and social outcomes of HIV-vulnerable and HIV-positive pregnant and post-partum adolescents and infants enrolled in a home visiting team programme in Kenya. *Trop Med Int Health*. 2021;26(6):640-8.
133. Li LI, Liang L-J, Chunqing LIN, Zunyou WU, Rotheram-Borus MJ. HIV prevention intervention to reduce HIV-related stigma: evidence from China. *AIDS (London)*. 2010;24(1):115-22.
134. Li J, Li J, Huang Y, Thornicroft G. Mental health training program for community mental health staff in Guangzhou, China: effects on knowledge of mental illness and stigma. *International journal of mental health systems*. 2014;8(1):49-.
135. Li X, Zhang L, Mao R, Zhao Q, Stanton B. Effect of social cognitive theory-based HIV education prevention program among high school students in Nanjing, China. *Health education research*. 2011;26(3):419-31.
136. Lohiniva A-L, Benkirane M, Numair T, Mahdy A, Saleh H, Zahran A, et al. HIV stigma intervention in a low-HIV prevalence setting: a pilot study in an Egyptian healthcare facility. *AIDS care*. 2016;28(5):644-52.
137. Makenzius M, Rehnstrom Loi U, Otieno B, Oguttu M. A stigma-reduction intervention targeting abortion and contraceptive use among adolescents in Kisumu County, Kenya: a quasi-experimental study. *Sex*. 2023;31(1):1881208.
138. Manzoor I, Khan F, Navied U, Abbas SM. Impact Of An Educational Intervention On Knowledge Of Health Care Professionals Regarding Hiv-Aids In Lahore, Pakistan. *J Ayub Med Coll Abbottabad*. 2019;31(3):372-8.
139. Maulik PK, Kallakuri S, Devarapalli S, Vadlamani VK, Jha V, Patel A. Increasing use of mental health services in remote areas using mobile technology: a pre-post evaluation of the SMART Mental Health project in rural India. *Journal of Global Health*. 2017;7(1):010408.
140. Mbeba MM, Kaponda CPN, Jere DL, Kachingwe SI, Crittenden KS, McCreary LL, et al. Peer Group Intervention Reduces Personal HIV Risk for Malawian Health Workers. *Journal of nursing scholarship*. 2011;43(1):72-81.
141. Mueller J, Alie C, Jonas B, Brown E, Sherr L. A quasi-experimental evaluation of a community-based art therapy intervention exploring the psychosocial health of children affected by HIV in South Africa. *Trop Med Int Health*. 2011;16(1):57-66.
142. Mutiso VN, Musyimi CW, Nayak SS, Musau AM, Rebello T, Nandoya E, et al. Stigma-related mental health knowledge and attitudes among primary health workers and community health volunteers in rural Kenya. *International Journal of Social Psychiatry*. 2017;63(6):508-17.
143. Norr KF, Ferrer L, Cianelli R, Crittenden KS, Irarrázabal L, Cabieses B, et al. Peer Group Intervention for HIV Prevention Among Health Workers in Chile. *The Journal of the Association of Nurses in AIDS Care*. 2012;23(1):73-86.
144. Norr KF, Norr JL, Kaponda CPN, Kachingwe SI, Mbweza EMD. Short-term effects of a peer group intervention for HIV prevention among trainee teachers in Malawi. *African journal of AIDS research : AJAR*. 2007;6(3):239-49.
145. Nyblade L, Addo NA, Atuahene K, Alsoufi N, Gyamera E, Jacinthe S, et al. Results from a difference-in-differences evaluation of health facility HIV and key population stigma-reduction interventions in Ghana. *Journal of the International AIDS Society*. 2020;23(4).
146. Onileimo V, Bella-Awusah T, Lasebikan V, Omigbodun O. Brief training in child and adolescent mental health: Impact on the knowledge and attitudes of pediatric nurses in Nigeria. *J Child Adolesc Psychiatr Nurs*. 2021;34(3):164-70.
147. Perez F, Dabis F. HIV prevention in Latin America: Reaching youth in Colombia. *AIDS care*. 2003;15(1):77-87.
148. Pisal H, Sutar S, Sastry J, Kapadia-Kundu N, Joshi A, Joshi M, et al. Nurses' Health Education Program in India Increases HIV Knowledge and Reduces Fear. *The Journal of the Association of Nurses in AIDS Care*. 2007;18(6):32-43.
149. Potts LC, Henderson C. Evaluation of anti-stigma social marketing campaigns in Ghana and Kenya: Time to Change Global. *BMC Public Health*. 2021;21(1):886.
150. Prahara SK, Salagre S, Sharma P. Stigma, Empathy, and Attitude (SEA) educational module for medical students to improve the knowledge and attitude towards persons with mental illness. *Asian Journal of Psychiatry*. 2021;65.
151. Pufahl J, Rawat S, Chaudary J, Shiff NJ. Even Mists Have Silver Linings: Promoting LGBTQ+ Acceptance and Solidarity through Community-Based Theatre in India. *Public Health*. 2021;194:252-9.

152. Pulerwitz J, Hughes L, Mehta M, Kidanu A, Verani F, Tewolde S. Changing Gender Norms and Reducing Intimate Partner Violence: Results From a Quasi-Experimental Intervention Study With Young Men in Ethiopia. *American journal of public health* (1971). 2015;105(1):132-7.
153. Pulerwitz J, Oanh KTH, Akinwolemiwa D, Ashburn K, Nyblade L. Improving Hospital-Based Quality of Care by Reducing HIV-Related Stigma: Evaluation Results from Vietnam. *AIDS and behavior*. 2015;19(2):246-56.
154. Ravindran AV, Herrera A, da Silva TL, Henderson J, Castrillo ME, Kutcher S. Evaluating the benefits of a youth mental health curriculum for students in Nicaragua: A parallel-group, controlled pilot investigation. *Global Mental Health Vol 5* 2018, ArtID e4. 2018;5.
155. Saad A, Rampal L, Sabitu K, AbdulRahman H, Awaisu A, AbuSamah B, Ibrahim A. Impact of a customized peer-facilitators training program related to sexual health intervention. *International health*. 2012;4(4):277-82.
156. Samal J, Dehury RK. Impact of a Structured Tuberculosis Awareness Strategy on the Knowledge and Behaviour of the Families in a Slum Area in Chhattisgarh, India. *Journal of Clinical and Diagnostic Research*. 2017;11(3):LC11-LC5.
157. Schensul SL, Ha T, Schensul JJ, Grady J, Burlison JA, Gaikwad S, et al. Multilevel and Multifactorial Interventions to Reduce Alcohol Consumption and Improve ART Adherence and Related Factors Among HIV Positive Men in Mumbai, India. *AIDS & Behavior*. 2021;25(3):290-301.
158. Shah SM, Heylen E, Srinivasan K, Perumpil S, Ekstrand ML. Reducing HIV Stigma Among Nursing Students: A Brief Intervention. *Western journal of nursing research*. 2014;36(10):1323-37.
159. Sifunda S, Reddy PS, Braithwaite R, Stephens T, Bhengu S, Ruitter RAC, van den Borne B. The Effectiveness of a Peer-Led HIV/AIDS and STI Health Education Intervention for Prison Inmates in South Africa. *Health education & behavior*. 2008;35(4):494-508.
160. Soares J, de Vargas D, Formigoni ML. [Knowledge and attitudes of nurses towards alcohol and related problems: the impact of an educational intervention]. *Rev Esc Enferm USP*. 2013;47(5):1178-85.
161. Sorcar P. Teaching taboo topics without talking about them: An epistemic study of a new approach to HIV/AIDS prevention education in India: Stanford University; 2009.
162. Stiernborg M, Zaldivar SB, Santiago EG. Effect of didactic teaching and experiential learning on nursing students' AIDS-related knowledge and attitudes. *AIDS care*. 1996;8(5):601-8.
163. Taher E, Ahmed Abdelhai R. Nurses' knowledge, perceptions, and attitudes towards HIV/AIDS: Effects of a health education intervention on two nursing groups in Cairo University, Egypt. *Journal of Public Health and Epidemiology*. 2011;3:144-54.
164. Tefera B, Ahmed Y. Contribution of the anti HIV/AIDS community conversation programs in preventing and controlling the spread of HIV/AIDS. *Ethiop J Health Dev*. 2013; 27:216-29.
165. Teoh XY, Voo SYM, Sulaiman N. Evaluating the impact of a pre-recorded online video on doctor's knowledge and attitude towards leprosy in Sabah and Labuan - a quasi experimental study. *Med J Malaysia*. 2023;78(5):574-82.
166. Tilahun D, Fekadu A, Tekola B, Araya M, Roth I, Davey B, et al. Ethiopian community health workers' beliefs and attitudes towards children with autism: Impact of a brief training intervention. *Autism*. 2019;23(1):39-49.
167. Uwakwe CBU. Systematized HIV/AIDS education for student nurses at the University of Ibadan, Nigeria: impact on knowledge, attitudes and compliance with universal precautions. *Journal of advanced nursing*. 2000;32(2):416-24.
168. Uys L, Chirwa M, Kohi T, Greeff M, Naidoo J, Makoae L, et al. Evaluation of a health setting-based stigma intervention in five African countries. *AIDS patient care and STDs*. 2009;23(12):1059-66.
169. van den Broek J, O'Donoghue J, Ishengoma A, Masao H, Mbega M. Evaluation of a sustained 7-year health education campaign on leprosy in Rufiji District, Tanzania. *Lepr Rev*. 1998;69(1):57-74.
170. Wang D, Operario D, Hong Q, Zhang H, Coates TJ. Intervention to train physicians in rural China on HIV/STI knowledge and risk reduction counseling: preliminary findings. *AIDS care*. 2009;21(4):468-72.
171. Williams AB, Wang H, Burgess J, Wu C, Gong Y, Li Y. Effectiveness of an HIV/AIDS educational programme for Chinese nurses. *Journal of advanced nursing*. 2006;53(6):710-20.
172. Worakul P, Thavichachart N, Lueboonthavatchai P. Effects of psycho-educational program on knowledge and attitude upon schizophrenia of schizophrenic patients' caregivers. *J Med Assoc Thai*. 2007;90(6):1199-204.
173. Ye XX, Huang H, Li SH, Xu G, Cai Y, Chen T, et al. HIV/AIDS education effects on behaviour among senior high school students in a medium-sized city in China. *Int J STD AIDS*. 2009;20(8):549-52.
174. Zhang T, Tian X, Ma F, Yang Y, Yu F, Zhao Y, et al. Community based promotion on VCT acceptance among rural migrants in Shanghai, China. *PloS one*. 2013;8(4):e60106-e.
175. Zhao M, Wang QY, Lu GH, Xu P, Xu H, McCoy CB. Risk behaviors and HIV/AIDS prevention education among IDUs in drug treatment in Shanghai. *Journal of urban health*. 2005;82(3 Suppl 4):iv84-iv91.

176. Berendes S, Rimal RN. Addressing the Slow Uptake of HIV Testing in Malawi: The Role of Stigma, Self-efficacy, and Knowledge in the Malawi BRIDGE Project. *The Journal of the Association of Nurses in AIDS Care*. 2011;22(3):215-28.
177. Blanchard AK, Mohan HL, Shahmanesh M, Prakash R, Isac S, Ramesh BM, et al. Community mobilization, empowerment and HIV prevention among female sex workers in south India. *BMC Public Health*. 2013;13(1):234-.
178. Waszak Geary C, McClain Burke H, Castelnau L, Neupane S, Ba Sall Y, Wong E, Toms Tucker H. MTV's "Staying Alive" Global Campaign Promoted Interpersonal Communication about HIV and Positive Beliefs about HIV Prevention. *AIDS education and prevention*. 2007;19(1):51-67.
179. Keating J, Meekers D, Adewuyi A. Assessing effects of a media campaign on HIV/AIDS awareness and prevention in Nigeria: results from the VISION Project. *BMC Public Health*. 2006;6(1):123-.
180. Lapinski MK, Nwulu P. Can a Short Film Impact HIV-Related Risk and Stigma Perceptions? Results from an Experiment in Abuja, Nigeria. *Health communication*. 2008;23(5):403-12.
181. Mall S, Middelkoop K, Mark D, Wood R, Bekker L-G. Changing patterns in HIV/AIDS stigma and uptake of voluntary counselling and testing services: The results of two consecutive community surveys conducted in the Western Cape, South Africa. *AIDS care*. 2013;25(2):194-201.
182. Manyedi M, Greeff M, Koen M. Implementing a programme for coping with stigma for women whose partners died of AIDS: A case study. *Africa journal of nursing and midwifery*. 2010;12(1):39-51.
183. Mashimo A, Miura H, Sakano S, Hamada A, Thepthien B-o, Umenai T. The Role of AIDS Volunteers in Developing Community-based Care for People with AIDS in Thailand. *Asia-Pacific journal of public health*. 2001;13(1):3-8.
184. Márquez-Cervantes E, Romero-Guerra DH, Costilla-Esquivel A. Mental illness attitudes in medical education: Assessing the stigma in medical students. *Salud mental*. 2023;46(2):105-10.
185. Maulik PK, Devarapalli S, Kallakuri S, Tripathi AP, Koschorke M, Thornicroft G. Longitudinal assessment of an anti-stigma campaign related to common mental disorders in rural India. *British Journal of Psychiatry*. 2019;214(2):90-5.
186. Nambiar D, Ramakrishnan V, Kumar P, Varma R, Balaji N, Rajendran J, et al. Knowledge, Stigma, and Behavioral Outcomes among Antiretroviral Therapy Patients Exposed to Nalamdana's Radio and Theater Program in Tamil Nadu, India. *AIDS education and prevention*. 2011;23(4):351-66.
187. Peltzer K, Parker W, Mabaso M, Makonko E, Zuma K, Ramlagan S. Impact of National HIV and AIDS Communication Campaigns in South Africa to Reduce HIV Risk Behaviour. *TheScientificWorld*. 2012;2012:384608-6.
188. Powell TM, Qushua N. A qualitative study of a mental health awareness intervention for Jordanian and resettled Syrian refugees in host communities. *International journal of social psychiatry*. 2023;69(1):161-72.
189. Sanhori Z, Eide AH, Ayazi T, Mdala I, Lien L. Change in Mental Health Stigma After a Brief Intervention Among Internally Displaced Persons in Central Sudan. *Community mental health journal*. 2019;55(3):534-41.
190. Takahashi K, Sunthan S, Chomroeun L, Rathmuny H, Sokhom C, Matsuoka H. The Effectiveness of HIV&frasl;AIDS awareness intervention in a rural area of Cambodia: illiteracy, mobility, sexual behavior, and HIV&frasl;AIDS. *Tropical Medicine and Health*. 2009;37(3):109-14.
191. West K. Jamaica, Three Years Later: Effects of Intensified Pro-Gay Activism on Severe Prejudice Against Lesbians and Gay Men. *The Journal of sex research*. 2016;53(9):1107-17.
192. Zunyou WU, Detels R, Guoping JI, Chen XU, Keming ROU, Huancheng D, Li V. Diffusion of HIV/AIDS knowledge, positive attitudes, and behaviors through training of health professionals in China. *AIDS education and prevention*. 2002;14(5):379-90.
